# Supplementary material for: Development of hybrid approach for named entity recognition in Uzbek language text
Source: PeerJ journal article supplement (doi:10.7717/peerj-cs.3489), 2026-01-27
Supplement: courpusNER.xlsx [file courpusNER.xlsx]

## Sheet: Sheet1
Sentence	Word	BIOES-Tag	English-version (translation)
Sentence 1	O‘zbekiston	B-LOC	Uzbekistan
Sentence 1	Respublikasi	E-LOC	Republic
Sentence 1	Prezidentining	S-PER	President's
Sentence 1	2023	O	2023
Sentence 1	yil	O	year
Sentence 1	25	O	25
Sentence 1	yanvardagi	O	January
Sentence 1	Respublika	S-LOC	Republic
Sentence 1	ijro	O	execution
Sentence 1	etuvchi	O	executive
Sentence 1	hokimiyat	B-ORG	authority
Sentence 1	organlari	E-ORG	bodies
Sentence 1	faoliyatini	O	activities
Sentence 1	samarali	O	effective
Sentence 1	yo‘lga	O	setting up
Sentence 1	qo‘yishga	O	establishing
Sentence 1	doir	O	related to
Sentence 1	birinchi	O	first
Sentence 1	navbatdagi	O	priority
Sentence 1	tashkiliy	O	organizational
Sentence 1	chora	O	measure
Sentence 1	tadbirlar	O	actions
Sentence 1	to‘g‘risida	O	about
Sentence 1	gi	O	-
Sentence 1	PF	O	PD
Sentence 1	14	O	14
Sentence 1	son	O	number
Sentence 1	ijrosini	O	implementation
Sentence 1	ta’minlash	O	ensuring
Sentence 1	maqsadida	O	purpose
Sentence 1	Oliy	B-ORG	Higher
Sentence 1	ta’lim	I-ORG	education
Sentence 1	fan	I-ORG	science
Sentence 1	va	I-ORG	and
Sentence 1	innovatsiyalar	I-ORG	innovations
Sentence 1	vazirligi	E-ORG	ministry
Sentence 1	faoliyatining	O	activities
Sentence 1	ustuvor	O	priority
Sentence 1	yo‘nalishlari	O	directions
Sentence 1	muvofiq	O	accordingly
Sentence 1	tasdiqlansin	O	be approved
Sentence 2	Oliy	B-ORG	Higher
Sentence 2	ta’lim	I-ORG	education
Sentence 2	fan	I-ORG	science
Sentence 2	va	I-ORG	and
Sentence 2	innovatsiyalar	I-ORG	innovations
Sentence 2	vazirligi	E-ORG	ministry
Sentence 2	tizimidagi	O	system's
Sentence 2	tashkilotlarni	S-ORG	organizations
Sentence 2	qayta	O	re
Sentence 2	tashkil	O	organization
Sentence 2	qilish	O	program
Sentence 2	dasturi	O	accordingly
Sentence 2	muvofiq	O	be
Sentence 2	tasdiqlansin	O	approved
Sentence 3	Oliy	B-ORG	Higher
Sentence 3	ta’lim	I-ORG	education
Sentence 3	fan	I-ORG	science
Sentence 3	va	I-ORG	and
Sentence 3	innovatsiyalar	I-ORG	innovations
Sentence 3	vazirligining	E-ORG	ministry's
Sentence 3	tashkiliy	O	organizational
Sentence 3	tuzilmasi	O	structure
Sentence 3	muvofiq	O	accordingly
Sentence 3	tasdiqlansin	O	be approved
Sentence 4	Buxoro	B-LOC	Bukhara
Sentence 4	viloyatidagi	E-LOC	region's
Sentence 4	Innovatsion	B-ORG	Innovative
Sentence 4	rivojlanish	I-ORG	development
Sentence 4	agentligining	E-ORG	agency's
Sentence 4	tashkiliy	O	organizational
Sentence 4	tuzilmasi	O	structure
Sentence 4	muvofiq	O	accordingly
Sentence 4	tasdiqlansin	O	be approved
Sentence 4	Bilim	O	Knowledge
Sentence 4	va	O	and
Sentence 4	Innovatsion	B-ORG	Innovative
Sentence 4	rivojlanish	I-ORG	development
Sentence 4	agentligining	E-ORG	agency's
Sentence 4	tashkiliy	O	organizational
Sentence 4	tuzilmasi	O	structure
Sentence 4	muvofiq	O	accordingly
Sentence 4	tasdiqlansin	O	be approved
Sentence 5	Namangan	B-LOC	Namangan
Sentence 5	viloyatidagi	E-LOC	region's
Sentence 5	Oliy	B-ORG	Higher
Sentence 5	ta’lim	I-ORG	education
Sentence 5	fan	I-ORG	science
Sentence 5	va	I-ORG	and
Sentence 5	innovatsiyalar	I-ORG	innovations
Sentence 5	vazirligi	E-ORG	ministry's
Sentence 5	sohasini	O	field's
Sentence 5	transformatsiya	O	transformation
Sentence 5	qilish	O	doing
Sentence 5	jarayonlarini	O	processes
Sentence 5	jadallashtirish	O	acceleration
Sentence 5	bo‘yicha	O	regarding
Sentence 5	yo‘l	O	road
Sentence 5	xaritasi	O	map
Sentence 5	muvofiq	O	accordingly
Sentence 5	tasdiqlansin	O	be approved
Sentence 6	Farg'ona	B-LOC	Fergana
Sentence 6	viloyatidagi	E-LOC	region's
Sentence 6	Oliy	B-ORG	Higher
Sentence 6	ta’lim	I-ORG	education
Sentence 6	muassasalari	E-ORG	institutions
Sentence 6	tizimini	O	system
Sentence 6	xalqaro	O	international
Sentence 6	standartlarga	O	standards
Sentence 6	muvofiq	O	accordingly
Sentence 6	takomillashtirish	O	improvement
Sentence 6	va	O	and
Sentence 6	ta’lim	O	education
Sentence 6	sifatini	O	quality
Sentence 6	oshirish	O	increase
Sentence 6	maqsadida	O	with the aim of
Sentence 6	bakalavriat	O	bachelor's
Sentence 6	ta’lim	O	education
Sentence 6	yo‘nalishlari	O	directions
Sentence 6	va	O	and
Sentence 6	magistratura	O	master's
Sentence 6	mutaxassisliklari	O	specialties
Sentence 6	ilg‘or	O	advanced
Sentence 6	xorijiy	O	foreign
Sentence 6	tajriba	O	experience
Sentence 6	hamda	O	as well as
Sentence 6	iqtisodiyot	O	economy
Sentence 6	soha	O	sector
Sentence 6	va	O	and
Sentence 6	tarmoqlarining	O	branches'
Sentence 6	kadrlarga	O	personnel
Sentence 6	bo‘lgan	O	needs
Sentence 6	ehtiyoji	O	based on
Sentence 6	asosida	O	re-
Sentence 6	qayta	O	considered
Sentence 6	ko‘rib	O	will
Sentence 6	chiqiladi	O	be
Sentence 7	Jizzax	B-LOC	Jizzakh
Sentence 7	viloyatidagi	E-LOC	region's
Sentence 7	Oliy	O	Higher
Sentence 7	ta’lim	O	education
Sentence 7	dasturlari	O	programs
Sentence 7	yetakchi	O	leading
Sentence 7	oliy	B-ORG	higher
Sentence 7	ta’lim	I-ORG	education
Sentence 7	muassasalari	E-ORG	institutions'
Sentence 7	bazasida	O	basis
Sentence 7	xalqaro	O	international
Sentence 7	tashkilotlarning	S-ORG	organizations'
Sentence 7	ta’lim	O	education
Sentence 7	sohalari	O	fields
Sentence 7	reytingida	O	ratings
Sentence 7	yuqori	O	top
Sentence 7	200	O	200
Sentence 7	talik	O	list
Sentence 7	ro‘yxatiga	O	included
Sentence 7	kirgan	O	foreign
Sentence 7	xorijiy	O	higher
Sentence 7	oliy	B-ORG	education
Sentence 7	ta’lim	I-ORG	institutions'
Sentence 7	muassasalarining	E-ORG	programs
Sentence 7	dasturi	O	based on
Sentence 7	asosida	O	re-
Sentence 7	qayta	O	developed
Sentence 7	ishlab	O	will
Sentence 7	chiqiladi	O	be
Sentence 8	Samarqand	B-LOC	Samarkand
Sentence 8	viloyatidagi	E-LOC	region's
Sentence 8	Oliy	B-ORG	Higher
Sentence 8	ta’lim	I-ORG	education
Sentence 8	muassasalarining	E-ORG	institutions'
Sentence 8	o‘quv	O	educational
Sentence 8	laboratoriya	O	laboratory
Sentence 8	bazasiga	O	base
Sentence 8	qo‘yilgan	O	set
Sentence 8	talablar	O	requirements
Sentence 8	ta’lim	O	education
Sentence 8	dasturlariga	O	programs
Sentence 8	ilmiy	O	scientific
Sentence 8	laboratoriyalar	O	laboratories
Sentence 8	iqtisodiyot	O	economy
Sentence 8	soha	O	sector
Sentence 8	va	O	and
Sentence 8	tarmoqlaridagi	O	branches'
Sentence 8	texnologik	O	technological
Sentence 8	jarayonlarga	O	processes
Sentence 8	moslashtiriladi	O	adapt
Sentence 9	Xorazm	B-LOC	Khorezm
Sentence 9	viloyatidagi	E-LOC	region's
Sentence 9	Professorlar	S-PER	Professors'
Sentence 9	yuklamasi	O	workload
Sentence 9	o‘quv	O	educational
Sentence 9	va	O	and
Sentence 9	ilmiy	O	scientific
Sentence 9	faoliyatga	O	activities
Sentence 9	o‘quv	O	educational
Sentence 9	jarayonlari	O	processes
Sentence 9	esa	O	also
Sentence 9	talabalarda	S-PER	students'
Sentence 9	mustaqil	O	independent
Sentence 9	ta’lim	O	learning
Sentence 9	olish	O	skills
Sentence 9	ko‘nikmasini	O	development
Sentence 9	rivojlantirishga	O	will
Sentence 9	yo‘naltiriladi	O	directed
Sentence 10	Qashqadaryo	B-LOC	Kashkadarya
Sentence 10	viloyatidagi	E-LOC	region's
Sentence 10	Oliy	B-ORG	Higher
Sentence 10	ta’lim	I-ORG	education
Sentence 10	fan	I-ORG	science
Sentence 10	va	I-ORG	and
Sentence 10	innovatsiyalar	I-ORG	innovations
Sentence 10	vazirligining	E-ORG	ministry's
Sentence 10	o‘rta	O	secondary
Sentence 10	maxsus	O	specialized
Sentence 10	professional	O	professional
Sentence 10	oliy	O	higher
Sentence 10	va	O	and
Sentence 10	oliy	O	higher
Sentence 10	ta’limdan	O	post
Sentence 10	keyingi	O	graduate
Sentence 10	ta’limni	O	education
Sentence 10	shuningdek	O	and
Sentence 10	kadrlar	O	personnel
Sentence 10	malakasini	O	qualifications
Sentence 10	oshirish	O	improvement
Sentence 10	va	O	and
Sentence 10	ularni	O	their
Sentence 10	qayta	O	retraining
Sentence 10	tayyorlashni	O	training
Sentence 10	amalga	O	implementing
Sentence 10	oshiruvchi	O	perfoming
Sentence 10	davlat	S-LOC	state
Sentence 10	va	O	and
Sentence 10	nodavlat	O	non-state
Sentence 10	ta’lim	B-ORG	education
Sentence 10	muassasalarining	E-ORG	institutions'
Sentence 10	keyingi	O	further
Sentence 10	o‘rinlarda	O	following
Sentence 10	ta’lim	B-ORG	education
Sentence 10	muassasalari	E-ORG	institutions
Sentence 10	tashqi	O	external
Sentence 10	baholashning	O	assessment's
Sentence 10	quyidagi	O	following
Sentence 10	yangi	O	new
Sentence 10	tizimini	O	system
Sentence 10	joriy	O	current
Sentence 10	etish	O	implementation
Sentence 10	to‘g‘risidagi	O	about
Sentence 10	taklifi	O	proposal
Sentence 10	ma’qullansin	O	approved
Sentence 10	unga	O	it
Sentence 10	muvofiq	O	accordingly
Sentence 10	ta’lim	B-ORG	education
Sentence 10	muassasalarini	E-ORG	institution
Sentence 10	attestatsiyadan	O	attestation
Sentence 10	va	O	and
Sentence 10	davlat	S-LOC	state
Sentence 10	akkreditatsiyasidan	O	accreditation
Sentence 10	o‘tkazish	O	perfoming
Sentence 10	tartibi	O	rules
Sentence 10	bekor	O	reject
Sentence 10	qilinib	O	is
Sentence 10	kompleks	O	complex
Sentence 10	va	O	and
Sentence 10	maxsus	O	special
Sentence 10	davlat	S-LOC	state
Sentence 10	akkreditatsiyasidan	O	accreditation
Sentence 10	o‘tkazish	O	perfoming
Sentence 10	tizimi	O	system
Sentence 10	joriy	O	current
Sentence 10	etiladi	O	implementation
Sentence 11	Buxoro	B-LOC	Bukhara
Sentence 11	viloyatidagi	E-LOC	region's
Sentence 11	Bunda	O	In
Sentence 11	kompleks	O	complex
Sentence 11	davlat	S-LOC	state
Sentence 11	akkreditatsiyasi	O	accreditation
Sentence 11	har	O	every
Sentence 11	yilda	O	year
Sentence 11	ta’lim	B-ORG	education
Sentence 11	muassasalarini	E-ORG	institutions
Sentence 11	tashqi	O	external
Sentence 11	baholash	O	assessment
Sentence 11	natijalari	O	results
Sentence 11	asosida	O	based
Sentence 11	o‘tkaziladi	O	is
Sentence 12	Namangan	B-LOC	Namangan
Sentence 12	viloyatidagi	E-LOC	region's
Sentence 12	Kompleks	O	complex
Sentence 12	davlat	S-LOC	state
Sentence 12	akkreditatsiyasidan	O	from
Sentence 12	o‘tmagan	O	not
Sentence 12	ta’lim	B-ORG	education
Sentence 12	muassasiga	E-ORG	to
Sentence 12	aniqlangan	O	identified
Sentence 12	kamchiliklarni	O	deficiencies
Sentence 12	bartaraf	O	elimination
Sentence 12	etish	O	to
Sentence 12	uchun	O	for
Sentence 12	oygacha	O	up
Sentence 12	muddat	O	term
Sentence 12	beriladi	O	is
Sentence 13	Farg'ona	B-LOC	Fergana
Sentence 13	viloyatidagi	E-LOC	region's
Sentence 13	Aniqlangan	O	identified
Sentence 13	kamchiliklarni	O	deficiencies
Sentence 13	bartaraf	O	elimination
Sentence 13	etmagan	O	not
Sentence 13	ta’lim	B-ORG	education
Sentence 13	muasassasi	E-ORG	institution
Sentence 13	faoliyatini	O	activity
Sentence 13	tugatish	O	termination
Sentence 13	litsenziyasini	O	license
Sentence 13	bekor	O	cancel
Sentence 13	qilish	O	to
Sentence 13	yoki	O	or
Sentence 13	ta’lim	O	education
Sentence 13	dasturini	O	program
Sentence 13	yopish	O	closure
Sentence 13	to‘g‘risida	O	about
Sentence 13	qaror	O	decision
Sentence 13	qabul	O	acceptance
Sentence 13	qilinadi	O	is
Sentence 13	Litsenziyasi	O	license
Sentence 13	bekor	O	cancel
Sentence 13	qilingan	O	revoked
Sentence 13	ta’lim	B-ORG	education
Sentence 13	muasassasi	E-ORG	institution
Sentence 13	yoki	O	or
Sentence 13	yopilgan	O	closed
Sentence 13	ta’lim	O	education
Sentence 13	dasturida	O	program
Sentence 13	tahsil	O	study
Sentence 13	olayotgan	O	receiving
Sentence 13	talabalarga	S-PER	to
Sentence 13	o‘qishini	O	education
Sentence 13	davlat	S-LOC	state
Sentence 13	va	O	and
Sentence 13	nodavlat	S-LOC	non-state
Sentence 13	ta’lim	B-ORG	education
Sentence 13	muasassalarining	E-ORG	institutions'
Sentence 13	mos	O	corresponding
Sentence 13	va	O	and
Sentence 13	turdosh	O	related
Sentence 13	ta’lim	O	education
Sentence 13	yo‘nalishlari	O	directions
Sentence 13	va	O	and
Sentence 13	mutaxassisliklariga	O	specialties
Sentence 13	belgilangan	O	established
Sentence 13	tartibda	O	in
Sentence 13	ko‘chirish	O	transfer
Sentence 13	huquqi	O	right
Sentence 13	beriladi	O	is
Sentence 14	Jizzax	B-LOC	Jizzakh
Sentence 14	viloyatidagi	E-LOC	region's
Sentence 14	Maxsus	O	special
Sentence 14	davlat	S-LOC	state
Sentence 14	akkreditatsiyasi	O	accreditation
Sentence 14	kadrlar	O	personnel
Sentence 14	tayyorlash	O	training
Sentence 14	yo‘lga	O	set
Sentence 14	qo‘yilayotgan	O	being
Sentence 14	ta’lim	O	education
Sentence 14	dasturlari	O	programs
Sentence 14	bo‘yicha	O	according
Sentence 14	o‘quv	O	educational
Sentence 14	jarayoni	O	process
Sentence 14	boshlanishidan	O	before
Sentence 14	oldin	O	before
Sentence 14	o‘tkaziladi	O	is
Sentence 15	Samarqand	B-LOC	Samarkand
Sentence 15	viloyatidagi	E-LOC	region's
Sentence 15	Maxsus	O	special
Sentence 15	davlat	S-LOC	state
Sentence 15	akkreditatsiyasidan	O	from
Sentence 15	o‘tmagan	O	not
Sentence 15	ta’lim	O	education
Sentence 15	dasturlari	O	programs
Sentence 15	bo‘yicha	O	according
Sentence 15	talaba	S-PER	student
Sentence 15	va	O	and
Sentence 15	o‘quvchilarni	S-PER	pupils
Sentence 15	o‘qitishga	O	teaching
Sentence 15	yo‘l	O	way
Sentence 15	qo‘yilmaydi	O	is
Sentence 16	Xorazm	B-LOC	Khorezm
Sentence 16	viloyatidagi	E-LOC	region's
Sentence 16	Ta’lim	O	education
Sentence 16	dasturlarini	O	programs
Sentence 16	xalqaro	O	international
Sentence 16	akkreditatsiyadan	O	from
Sentence 16	o‘tkazish	O	conducting
Sentence 16	amaliyoti	O	practice
Sentence 16	joriy	O	introduction
Sentence 16	etiladi	O	is
Sentence 17	Qashqadaryo	B-LOC	Kashkadarya
Sentence 17	viloyatidagi	E-LOC	region's
Sentence 17	Oliy	B-ORG	Higher
Sentence 17	ta’lim	I-ORG	education
Sentence 17	fan	I-ORG	science
Sentence 17	va	I-ORG	and
Sentence 17	innovatsiyalar	I-ORG	innovations
Sentence 17	vazirligi	E-ORG	ministry
Sentence 17	O'zbekistonda	S-LOC	in
Sentence 17	tan	O	recognized
Sentence 17	olinadigan	O	accepted
Sentence 17	xalqaro	O	international
Sentence 17	akkreditatsiya	O	accreditation
Sentence 17	tashkilotlariga	S-ORG	to
Sentence 17	qo‘yiladigan	O	set
Sentence 17	talablarni	O	requirements
Sentence 17	belgilaydi	O	determines
Sentence 17	va	O	and
Sentence 17	ularning	O	their
Sentence 17	reyestrini	O	registry
Sentence 17	yuritadi	O	maintains
Sentence 18	Buxoro	B-LOC	Bukhara
Sentence 18	viloyatidagi	E-LOC	region's
Sentence 18	mazkur	O	this
Sentence 18	reyestrga	O	to
Sentence 18	kiritilgan	O	included
Sentence 18	xalqaro	O	international
Sentence 18	akkreditatsiya	O	accreditation
Sentence 18	tashkilotlari	S-ORG	organizations
Sentence 18	tomonidan	O	by
Sentence 18	akkreditatsiyadan	O	from
Sentence 18	o‘tkazilgan	O	conducted
Sentence 18	ta’lim	O	education
Sentence 18	dasturlari	O	programs
Sentence 18	navbatdagi	O	next
Sentence 18	kompleks	O	complex
Sentence 18	davlat	S-LOC	state
Sentence 18	akkreditatsiyasida	O	in
Sentence 18	tekshiruvdan	O	from
Sentence 18	o‘tkazilmaydi	O	are
Sentence 19	Namangan	B-LOC	Namangan
Sentence 19	viloyatidagi	E-LOC	region's
Sentence 19	Oliy	B-ORG	Higher
Sentence 19	ta’lim	I-ORG	education
Sentence 19	fan	I-ORG	science
Sentence 19	va	I-ORG	and
Sentence 19	innovatsiyalar	I-ORG	innovations
Sentence 19	vazirligi	E-ORG	ministry
Sentence 19	tomonidan	O	by
Sentence 19	tan	O	recognized
Sentence 19	olingan	O	taken
Sentence 19	nufuzli	O	prestigious
Sentence 19	xalqaro	O	international
Sentence 19	reyting	O	rating
Sentence 19	tashkilotlarining	S-ORG	organizations'
Sentence 19	amaldagi	O	current
Sentence 19	ro‘yxatida	O	in
Sentence 19	birinchi	O	first
Sentence 19	ming	O	thousand
Sentence 19	talikka	O	ranking
Sentence 19	kirgan	O	included
Sentence 19	oliy	B-ORG	higher
Sentence 19	ta’lim	I-ORG	education
Sentence 19	muasassalari	E-ORG	institutions
Sentence 19	navbatdagi	O	next
Sentence 19	kompleks	O	complex
Sentence 19	davlat	S-LOC	state
Sentence 19	akkreditatsiyasidan	O	from
Sentence 19	ozod	O	exempt
Sentence 19	qilinadi	O	is
Sentence 20	Farg'ona	B-LOC	Fergana
Sentence 20	viloyatidagi	E-LOC	region's
Sentence 20	Ta’lim	B-ORG	education
Sentence 20	muasassalarining	E-ORG	institutions'
Sentence 20	davlat	S-LOC	state
Sentence 20	akkreditatsiyasi	O	accreditation
Sentence 20	to‘lov	O	payment
Sentence 20	asosida	O	on
Sentence 20	Oliy	B-ORG	Higher
Sentence 20	ta’lim	I-ORG	education
Sentence 20	fan	I-ORG	science
Sentence 20	va	I-ORG	and
Sentence 20	innovatsiyalar	I-ORG	innovations
Sentence 20	vazirligi	E-ORG	ministry
Sentence 20	tomonidan	O	by
Sentence 20	o‘tkaziladi	O	is
Sentence 20	hamda	O	and
Sentence 20	to‘lov	O	payment
Sentence 20	jumladan	O	including
Sentence 20	akkreditatsiyani	O	accreditation
Sentence 20	o‘tkazishga	O	conducting
Sentence 20	jalb	O	involved
Sentence 20	qilingan	O	made
Sentence 20	mutaxassislar	S-PER	specialists
Sentence 20	mehnatiga	O	labor
Sentence 20	haq	O	payment
Sentence 20	to‘lash	O	pay
Sentence 20	uchun	O	for
Sentence 20	yo‘naltiriladi	O	is
Sentence 21	O'zbekistonda	S-LOC	in
Sentence 21	faoliyat	O	activity
Sentence 21	yurituvchi	O	conducting
Sentence 21	oliy	B-ORG	higher
Sentence 21	ta’lim	I-ORG	education
Sentence 21	muasassalarining	E-ORG	institutions'
Sentence 21	reytingini	O	rating
Sentence 21	yuritish	O	maintain
Sentence 21	bo‘yicha	O	regarding
Sentence 21	shunday	O	such
Sentence 21	tartib	O	procedure
Sentence 21	o‘rnatilsinki	O	be
Sentence 21	unga	O	to
Sentence 21	ko‘ra	O	according
Sentence 21	reyting	O	rating
Sentence 21	Oliy	B-ORG	Higher
Sentence 21	ta’lim	I-ORG	education
Sentence 21	fan	I-ORG	science
Sentence 21	va	I-ORG	and
Sentence 21	innovatsiyalar	I-ORG	innovations
Sentence 21	vazirligi	E-ORG	ministry
Sentence 21	tomonidan	O	by
Sentence 21	ta’lim	B-ORG	education
Sentence 21	muasassalarining	E-ORG	institutions'
Sentence 21	faoliyati	O	activity
Sentence 21	va	O	and
Sentence 21	ta’lim	O	education
Sentence 21	jarayoniga	O	to
Sentence 21	aralashmagan	O	not
Sentence 21	holda	O	while
Sentence 21	ma’lumotlarni	O	information
Sentence 21	axborot	O	information
Sentence 21	tizimi	O	system
Sentence 21	orqali	O	through
Sentence 21	olish	O	obtaining
Sentence 21	yo‘li	O	way
Sentence 21	bilan	O	with
Sentence 21	yuritiladi	O	is
Sentence 22	Jizzax	B-LOC	Jizzakh
Sentence 22	viloyatidagi	E-LOC	region's
Sentence 22	2024	O	2024
Sentence 22	yil	O	year
Sentence 22	yanvardan	O	from
Sentence 22	boshlab	O	starting
Sentence 22	reyting	O	rating
Sentence 22	davlat	S-LOC	state
Sentence 22	va	O	and
Sentence 22	nodavlat	O	non-state
Sentence 22	oliy	B-ORG	higher
Sentence 22	ta’lim	I-ORG	education
Sentence 22	muasassalari	E-ORG	institutions
Sentence 22	bo‘yicha	O	according
Sentence 22	umumiy	O	general
Sentence 22	aniqlanadi	O	is
Sentence 23	Samarqand	B-LOC	Samarkand
Sentence 23	viloyatidagi	E-LOC	region's
Sentence 23	so‘nggi	O	last
Sentence 23	besh	O	five
Sentence 23	yil	O	year
Sentence 23	davomida	O	during
Sentence 23	reytingda	O	in
Sentence 23	birinchi	O	first
Sentence 23	on	O	ten
Sentence 23	talik	O	list
Sentence 23	o‘rinni	O	place
Sentence 23	egallagan	O	occupied
Sentence 23	oliy	B-ORG	higher
Sentence 23	ta’lim	I-ORG	education
Sentence 23	muasassalari	E-ORG	institutions
Sentence 23	navbatdagi	O	next
Sentence 23	kompleks	O	complex
Sentence 23	davlat	S-LOC	state
Sentence 23	akkreditatsiyasidan	O	from
Sentence 23	ozod	O	exempt
Sentence 23	qilinadi	O	is
Sentence 24	Xorazm	B-LOC	Khorezm
Sentence 24	viloyatidagi	E-LOC	region's
Sentence 24	2025	O	2025
Sentence 24	yil	O	year
Sentence 24	yanvardan	O	from
Sentence 24	boshlab	O	starting
Sentence 24	nodavlat	O	non-state
Sentence 24	oliy	B-ORG	higher
Sentence 24	ta’lim	I-ORG	education
Sentence 24	muasassalariga	E-ORG	to
Sentence 24	davlat	S-LOC	state
Sentence 24	buyurtmasi	O	order
Sentence 24	asosida	O	on
Sentence 24	kadrlar	O	personnel
Sentence 24	tayyorlash	O	training
Sentence 24	bo‘yicha	O	regarding
Sentence 24	kvota	O	quota
Sentence 24	ularning	O	their
Sentence 24	reytingdagi	O	in
Sentence 24	o‘rniga	O	place
Sentence 24	muvofiq	O	accordingly
Sentence 24	ajratiladi	O	is
Sentence 25	Qashqadaryo	B-LOC	Kashkadarya
Sentence 25	viloyatidagi	E-LOC	region's
Sentence 25	Oliy	B-ORG	Higher
Sentence 25	ta’lim	I-ORG	education
Sentence 25	muasassalarining	E-ORG	institutions'
Sentence 25	ta’lim	O	education
Sentence 25	sohalari	O	fields
Sentence 25	kesimidagi	O	in terms of
Sentence 25	reytingini	O	rating
Sentence 25	yuritish	O	to maintain
Sentence 25	yo‘lga	O	to set up
Sentence 25	qo‘yiladi	O	is established
Sentence 26	2023	O	2023
Sentence 26	2024	O	2024
Sentence 26	o‘quv	O	educational
Sentence 26	yilidan	O	from the year
Sentence 26	boshlab	O	starting
Sentence 26	akademik	B-ORG	academic
Sentence 26	litseylarga	E-ORG	to lyceums
Sentence 26	o‘quvchilarni	S-PER	students
Sentence 26	qabul	O	admission
Sentence 26	qilishda	O	in doing
Sentence 26	yozma	O	written
Sentence 26	imtihon	O	examination
Sentence 26	asosida	O	based on
Sentence 26	dastlabki	O	initial
Sentence 26	saralash	O	selection
Sentence 26	bosqichi	O	stage
Sentence 26	bekor	O	canceled
Sentence 26	qilinadi	O	is done
Sentence 27	Kollej	S-ORG	College
Sentence 27	va	O	and
Sentence 27	texnikumlarning	O	of technical schools
Sentence 27	ta’lim	O	education
Sentence 27	dasturlariga	O	to programs
Sentence 27	davlat	S-LOC	state
Sentence 27	granti	O	grant
Sentence 27	asosidagi	O	based on
Sentence 27	qabul	O	admission
Sentence 27	ko‘rsatkichlari	O	indicators
Sentence 27	ikki	O	two
Sentence 27	baravarga	O	times
Sentence 27	oshiriladi	O	will be increased
Sentence 28	Oliy	B-ORG	Higher
Sentence 28	ta’lim	I-ORG	education
Sentence 28	muassasalariga	E-ORG	to institutions
Sentence 28	hujjat	O	documents
Sentence 28	topshirishda	O	when submitting
Sentence 28	abituriyentlarga	S-PER	to applicants
Sentence 28	davlat	S-LOC	state
Sentence 28	granti	O	grant
Sentence 28	yoki	O	or
Sentence 28	ta’lim	O	education
Sentence 28	yo‘nalishi	O	direction
Sentence 28	ustuvorliklaridan	O	from priorities
Sentence 28	birini	O	one
Sentence 28	tanlash	O	to choose
Sentence 28	va	O	and
Sentence 28	tanlagan	O	chosen
Sentence 28	ustuvorligi	O	priority
Sentence 28	bo‘yicha	O	according to
Sentence 28	bakalavriat	O	bachelor's
Sentence 28	ta’lim	O	education
Sentence 28	yo‘nalishlari	O	directions
Sentence 28	ketma	O	sequential
Sentence 28	ketligida	O	order
Sentence 28	tanlovda	O	in selection
Sentence 28	ishtirok	O	participation
Sentence 28	etish	O	to do
Sentence 28	huquqi	O	right
Sentence 28	beriladi	O	is given
Sentence 29	Talabaning	S-PER	student's
Sentence 29	ta’lim	O	education
Sentence 29	yo‘nalishiga	O	to the direction
Sentence 29	mos	O	corresponding
Sentence 29	startap	O	startup
Sentence 29	loyihasini	O	project
Sentence 29	hamda	O	and
Sentence 29	ratsionalizatorlik	O	rationalization
Sentence 29	g‘oyasini	O	idea
Sentence 29	bitiruv	O	graduation
Sentence 29	malakaviy	O	qualification
Sentence 29	ishi	O	work
Sentence 29	va	O	and
Sentence 29	magistrlik	O	master's
Sentence 29	dissertatsiyasi	O	dissertation
Sentence 29	sifatida	O	as
Sentence 29	himoya	O	defense
Sentence 29	qilish	O	to do
Sentence 29	amaliyoti	O	practice
Sentence 29	joriy	O	is introduced
Sentence 29	etiladi	O	is done
Sentence 30	Oliy	B-ORG	Higher
Sentence 30	ta’lim	I-ORG	education
Sentence 30	muassasalari	E-ORG	institutions
Sentence 30	talabalarining	S-PER	students'
Sentence 30	iqtisodiyot	O	economy
Sentence 30	tarmoqlari	O	sectors
Sentence 30	korxonalarida	S-ORG	at enterprises
Sentence 30	haq	O	paid
Sentence 30	to‘lanadigan	O	payable
Sentence 30	qisqa	O	short
Sentence 30	muddatli	O	term
Sentence 30	maqsadli	O	targeted
Sentence 30	ishlab	O	production
Sentence 30	chiqarish	O	output
Sentence 30	amaliyotlari	O	internships
Sentence 30	tashkil	O	organization
Sentence 30	etiladi	O	are conducted
Sentence 30	hamda	O	and
Sentence 30	Ilm	B-ORG	Science
Sentence 30	fanni	I-ORG	science
Sentence 30	moliyalashtirish	I-ORG	financing
Sentence 30	va	I-ORG	and
Sentence 30	innovatsiyalarni	I-ORG	innovations
Sentence 30	qo‘llab	I-ORG	support
Sentence 30	quvvatlash	I-ORG	assistance
Sentence 30	jamg‘armasi	E-ORG	fund
Sentence 30	mablag‘lari	O	funds
Sentence 30	hisobidan	O	at the expense of
Sentence 30	moliyalashtiriladi	O	will be financed
Sentence 31	2024	O	2024
Sentence 31	2025	O	2025
Sentence 31	o‘quv	O	academic
Sentence 31	yilidan	O	year
Sentence 31	boshlab	O	starting
Sentence 31	oliy	B-ORG	higher
Sentence 31	ta’lim	I-ORG	education
Sentence 31	muassasalariga	E-ORG	to institutions
Sentence 31	kirish	O	entrance
Sentence 31	imtihonlarini	O	exams
Sentence 31	topshirish	O	taking
Sentence 31	avval	O	before
Sentence 31	test	O	test
Sentence 31	so‘ng	O	after
Sentence 31	tanlov	O	selection
Sentence 31	tamoyili	O	principle
Sentence 31	asosida	O	based on
Sentence 31	tashkil	O	organized
Sentence 31	etiladi	O	is done
Sentence 31	hamda	O	and
Sentence 31	abituriyentlarga	S-PER	to applicants
Sentence 31	test	O	test
Sentence 31	sinovi	O	examination
Sentence 31	natijasida	O	as a result
Sentence 31	to‘plagan	O	collected
Sentence 31	balidan	O	from score
Sentence 31	kelib	O	coming
Sentence 31	chiqib	O	based on
Sentence 31	oliy	B-ORG	higher
Sentence 31	ta’lim	I-ORG	education
Sentence 31	muassasasi	E-ORG	institution
Sentence 31	ta’lim	O	education
Sentence 31	yo‘nalishi	O	direction
Sentence 31	va	O	and
Sentence 31	shaklini	O	form
Sentence 31	tanlash	O	choosing
Sentence 31	imkoniyati	O	opportunity
Sentence 31	yaratiladi	O	is created
Sentence 32	Umumta’lim	O	General education
Sentence 32	fanlari	O	subjects
Sentence 32	bo‘yicha	O	according to
Sentence 32	xalqaro	O	international
Sentence 32	imtihon	O	examination
Sentence 32	natijalari	O	results
Sentence 32	bo‘yicha	O	according to
Sentence 32	sertifikatlar	O	certificates
Sentence 32	davlat	B-ORG	state
Sentence 32	oliy	I-ORG	higher
Sentence 32	ta’lim	I-ORG	education
Sentence 32	muassasalariga	E-ORG	to institutions
Sentence 32	qabul	O	admission
Sentence 32	qilishda	O	in admission
Sentence 32	inobatga	O	into account
Sentence 32	olinadi	O	are taken
Sentence 33	Bunda	O	In this case
Sentence 33	tan	O	recognized
Sentence 33	olingan	O	obtained
Sentence 33	xalqaro	O	international
Sentence 33	sertifikatlar	O	certificates
Sentence 33	ro‘yxati	O	list
Sentence 33	Oliy	B-ORG	Higher
Sentence 33	ta’lim	I-ORG	education
Sentence 33	fan	I-ORG	science
Sentence 33	va	I-ORG	and
Sentence 33	innovatsiyalar	I-ORG	innovations
Sentence 33	vazirligi	E-ORG	ministry
Sentence 33	qarori	O	decision
Sentence 33	bilan	O	with
Sentence 33	tasdiqlanadi	O	is approved
Sentence 34	Yuqori	O	High
Sentence 34	salohiyatli	O	potential
Sentence 34	akademik	B-ORG	academic
Sentence 34	litseylar	E-ORG	lyceums
Sentence 34	o‘quv	O	educational
Sentence 34	dasturlari	O	programs
Sentence 34	xalqaro	O	international
Sentence 34	dasturlar	O	programs
Sentence 34	International	O	International
Sentence 34	Advanced	O	Advanced
Sentence 34	Levels	O	Levels
Sentence 34	International	O	International
Sentence 34	Baccalaureate	O	Baccalaureate
Sentence 34	asosida	O	based on
Sentence 34	ishlab	O	developed
Sentence 34	chiqiladi	O	are created
Sentence 35	Oliy	B-ORG	Higher
Sentence 35	ta’lim	I-ORG	education
Sentence 35	fan	I-ORG	science
Sentence 35	va	I-ORG	and
Sentence 35	innovatsiyalar	I-ORG	innovations
Sentence 35	vazirligi	E-ORG	ministry
Sentence 35	tomonidan	O	by
Sentence 35	vakolati	O	authority
Sentence 35	doirasida	O	within
Sentence 35	nodavlat	O	non
Sentence 35	ta’lim	O	education
Sentence 35	tashkilotlari	S-ORG	organizations
Sentence 35	faoliyatini	O	activities
Sentence 35	davlat	S-LOC	state
Sentence 35	akkreditatsiyasidan	O	from accreditation
Sentence 35	o‘tkazish	O	conducting
Sentence 35	vakolatli	B-ORG	authorized
Sentence 35	organni	E-ORG	body
Sentence 35	xabardor	O	notification
Sentence 35	qilish	O	to do
Sentence 35	tartibida	O	in the manner
Sentence 35	amalga	O	implementation
Sentence 35	oshiriladi	O	is carried out
Sentence 36	Belgilansinki	O	It is established that
Sentence 36	davlat	S-LOC	state
Sentence 36	ilmiy	O	scientific
Sentence 36	dasturlarini	O	programs
Sentence 36	shakllantirishda	O	in forming
Sentence 36	quyidagi	O	the following
Sentence 36	tartib	O	procedure
Sentence 36	joriy	O	introduced
Sentence 36	etiladi	O	is implemented
Sentence 37	Oliy	B-ORG	Higher
Sentence 37	ta’lim	I-ORG	education
Sentence 37	fan	I-ORG	science
Sentence 37	va	I-ORG	and
Sentence 37	innovatsiyalar	I-ORG	innovations
Sentence 37	vazirligi	E-ORG	ministry
Sentence 37	tomonidan	O	by
Sentence 37	iqtisodiyot	O	economy
Sentence 37	tarmoqlari	O	sectors
Sentence 37	va	O	and
Sentence 37	ijtimoiy	O	social
Sentence 37	sohalarning	O	spheres'
Sentence 37	mavjud	O	existing
Sentence 37	muammolari	O	problems
Sentence 37	ilmiy	O	scientific
Sentence 37	yechimiga	O	solution
Sentence 37	qaratilgan	O	directed
Sentence 37	ilmiy	O	scientific
Sentence 37	tadqiqot	O	research
Sentence 37	ishlariga	O	works
Sentence 37	davlat	O	state
Sentence 37	buyurtmasi	O	order
Sentence 37	tematik	O	thematic
Sentence 37	ilmiy	O	scientific
Sentence 37	mavzular	O	topics
Sentence 37	ro‘yxati	O	list
Sentence 37	tasdiqlanadi	O	is approved
Sentence 38	Fan	O	Science
Sentence 38	yo‘nalishlari	O	directions
Sentence 38	bo‘yicha	O	according to
Sentence 38	tegishli	O	relevant
Sentence 38	ilmiy	B-ORG	scientific
Sentence 38	texnik	I-ORG	technical
Sentence 38	kengashlar	E-ORG	councils
Sentence 38	tomonidan	O	by
Sentence 38	loyihalarning	O	projects'
Sentence 38	ilmiy	O	scientific
Sentence 38	ekspertizasi	O	expertise
Sentence 38	tashkil	O	organized
Sentence 38	etiladi	O	is done
Sentence 39	Davlat	O	State
Sentence 39	ilmiy	O	scientific
Sentence 39	dasturlariga	O	to programs
Sentence 39	kiritiladigan	O	to be included
Sentence 39	loyihalarning	O	projects'
Sentence 39	yakuniy	O	final
Sentence 39	ro‘yxati	O	list
Sentence 39	tasdiqlanadi	O	is approved
Sentence 40	Innovatsion	B-ORG	Innovative
Sentence 40	rivojlanish	I-ORG	development
Sentence 40	agentligi	E-ORG	agency
Sentence 40	tomonidan	O	by
Sentence 40	tasdiqlangan	O	approved
Sentence 40	tematik	O	thematic
Sentence 40	ilmiy	O	scientific
Sentence 40	mavzular	O	topics
Sentence 40	bo‘yicha	O	according to
Sentence 40	ilmiy	O	scientific
Sentence 40	tadqiqot	O	research
Sentence 40	ishlariga	O	works
Sentence 40	davlat	O	state
Sentence 40	buyurtmasi	O	order
Sentence 40	talablariga	O	requirements
Sentence 40	muvofiq	O	in accordance
Sentence 40	tanlovlar	O	competitions
Sentence 40	o‘tkaziladi	O	are held
Sentence 40	shuningdek	O	as well as
Sentence 40	ilmiy	B-ORG	scientific
Sentence 40	texnik	I-ORG	technical
Sentence 40	kengashlar	E-ORG	councils
Sentence 40	va	O	and
Sentence 40	moliyaviy	O	financial
Sentence 40	iqtisodiy	O	economic
Sentence 40	ekspertizasi	O	expertise
Sentence 40	tashkil	O	organized
Sentence 40	etiladi	O	is done
Sentence 41	Tasdiqlangan	O	Approved
Sentence 41	loyihalar	O	projects
Sentence 41	bo‘yicha	O	according to
Sentence 41	shartnomalar	O	contracts
Sentence 41	rasmiylashtiriladi	O	are formalized
Sentence 42	Ilmiy	O	Scientific
Sentence 42	loyihalarning	O	projects'
Sentence 42	oraliq	O	interim
Sentence 42	va	O	and
Sentence 42	yakuniy	O	final
Sentence 42	monitoringi	O	monitoring
Sentence 42	yuritiladi	O	is conducted
Sentence 43	Davlat	O	State
Sentence 43	ilmiy	O	scientific
Sentence 43	dasturlariga	O	to programs
Sentence 43	kiritilgan	O	included
Sentence 43	loyihalar	O	projects
Sentence 43	Oliy	B-ORG	Higher
Sentence 43	ta’lim	I-ORG	education
Sentence 43	fan	I-ORG	science
Sentence 43	va	I-ORG	and
Sentence 43	innovatsiyalar	I-ORG	innovations
Sentence 43	vazirligining	E-ORG	ministry's
Sentence 43	Ilm	B-ORG	Science
Sentence 43	fan	I-ORG	science
Sentence 43	va	I-ORG	and
Sentence 43	innovatsiyalar	I-ORG	innovations
Sentence 43	kengashi	E-ORG	council
Sentence 43	qaroriga	O	decision
Sentence 43	asosan	O	based on
Sentence 43	Ilm	B-ORG	Science
Sentence 43	fanni	I-ORG	science
Sentence 43	moliyalashtirish	I-ORG	financing
Sentence 43	va	I-ORG	and
Sentence 43	innovatsiyalarni	I-ORG	innovations
Sentence 43	qo‘llab	I-ORG	support
Sentence 43	quvvatlash	I-ORG	assistance
Sentence 43	jamg‘armasi	E-ORG	fund
Sentence 43	mablag‘lari	O	funds
Sentence 43	hisobidan	O	at the expense of
Sentence 43	moliyalashtiriladi	O	is financed
Sentence 43	Ilmiy	O	Scientific
Sentence 43	tadqiqot	O	research
Sentence 43	ishlariga	O	works
Sentence 43	davlat	O	state
Sentence 43	buyurtmasiga	O	order
Sentence 43	muvofiq	O	in accordance
Sentence 43	bajariladigan	O	to be performed
Sentence 43	ilmiy	O	scientific
Sentence 43	loyihalar	O	projects
Sentence 43	bo‘yicha	O	according to
Sentence 43	tanlovlar	O	competitions
Sentence 43	o‘tkazish	O	conducting
Sentence 43	loyihalarni	O	projects
Sentence 43	ilmiy	B-ORG	scientific
Sentence 43	texnik	I-ORG	technical
Sentence 43	kengashlar	E-ORG	councils
Sentence 43	va	O	and
Sentence 43	moliyaviy	O	financial
Sentence 43	iqtisodiy	O	economic
Sentence 43	ekspertizadan	O	from expertise
Sentence 43	o‘tkazish	O	conducting
Sentence 43	hamda	O	and
Sentence 43	tanlab	O	selecting
Sentence 43	olish	O	obtaining
Sentence 43	jarayonlari	O	processes
Sentence 43	Davlat	O	State
Sentence 43	ilmiy	O	scientific
Sentence 43	dasturlarining	O	programs'
Sentence 43	yagona	O	unified
Sentence 43	intellektual	O	intellectual
Sentence 43	elektron	O	electronic
Sentence 43	platformasi	O	platform
Sentence 43	orqali	O	through
Sentence 43	amalga	O	implementation
Sentence 43	oshiriladi	O	is carried out
Sentence 44	Oliy	B-ORG	Higher
Sentence 44	ta’lim	I-ORG	education
Sentence 44	fan	I-ORG	science
Sentence 44	va	I-ORG	and
Sentence 44	innovatsiyalar	I-ORG	innovations
Sentence 44	vazirligi	E-ORG	ministry
Sentence 44	huzuridagi	O	under
Sentence 44	tegishli	O	relevant
Sentence 44	fan	O	science
Sentence 44	yo‘nalishlari	O	directions
Sentence 44	bo‘yicha	O	according to
Sentence 44	ilmiy	B-ORG	scientific
Sentence 44	texnik	I-ORG	technical
Sentence 44	kengashlar	E-ORG	councils
Sentence 44	faoliyati	O	activities
Sentence 44	quyidagi	O	the following
Sentence 44	tartibda	O	procedure
Sentence 44	tashkil	O	organized
Sentence 44	etilsin	O	shall be
Sentence 45	Ilmiy	B-ORG	Scientific
Sentence 45	texnik	I-ORG	technical
Sentence 45	kengashlar	E-ORG	councils
Sentence 45	Scopus	O	Scopus
Sentence 45	va	O	and
Sentence 45	Web	O	Web
Sentence 45	of	O	of
Sentence 45	Science	O	Science
Sentence 45	xalqaro	O	international
Sentence 45	ilmiy	O	scientific
Sentence 45	ma’lumotlar	O	data
Sentence 45	bazalarida	O	in databases
Sentence 45	Xirsh	O	Hirsch
Sentence 45	indeksiga	O	index
Sentence 45	ega	O	possessing
Sentence 45	bundan	O	except
Sentence 45	madaniyat	B-LOC	culture
Sentence 45	markazini	E-LOC	center
Sentence 45	o‘zbek	O	Uzbek
Sentence 45	tili	O	language
Sentence 45	tarix	O	history
Sentence 45	sohalari	O	fields
Sentence 45	mustasno	O	except
Sentence 45	hamda	O	and
Sentence 45	yangi	O	new
Sentence 45	ilmiy	O	scientific
Sentence 45	yo‘nalishlarda	O	in directions
Sentence 45	xalqaro	O	international
Sentence 45	darajada	O	level
Sentence 45	ilmiy	O	scientific
Sentence 45	tadqiqot	O	research
Sentence 45	ishlari	O	works
Sentence 45	bilan	O	with
Sentence 45	shug‘ullanayotgan	O	engaged
Sentence 45	olimlar	S-PER	scientists
Sentence 45	orasidan	O	among
Sentence 45	21	O	21
Sentence 45	nafar	O	persons
Sentence 45	tarkibda	O	in composition
Sentence 45	shakllantiriladi	O	will be formed
Sentence 45	Ilmiy	B-ORG	Scientific
Sentence 45	texnik	I-ORG	technical
Sentence 45	kengashlar	E-ORG	councils
Sentence 45	a’zolarining	O	members'
Sentence 45	yarmi	O	half
Sentence 45	har	O	every
Sentence 45	oyda	O	month
Sentence 45	almashtiriladi	O	will be replaced
Sentence 45	va	O	and
Sentence 45	ilmiy	B-ORG	scientific
Sentence 45	texnik	I-ORG	technical
Sentence 45	kengashlar	E-ORG	councils
Sentence 45	tarkibi	O	composition
Sentence 45	bir	O	one
Sentence 45	yilda	O	in a year
Sentence 45	to‘liq	O	completely
Sentence 45	yangilanadi	O	is renewed
Sentence 45	Davlat	O	State
Sentence 45	buyurtmasi	O	order
Sentence 45	doirasida	O	within
Sentence 45	shakllantirilgan	O	formed
Sentence 45	loyihalarning	O	projects'
Sentence 45	ilmiy	B-ORG	scientific
Sentence 45	texnik	I-ORG	technical
Sentence 45	kengashlar	E-ORG	councils
Sentence 45	dagi	O	in
Sentence 45	muhokamasiga	O	for discussion
Sentence 45	xorijlik	O	foreign
Sentence 45	vatandosh	O	compatriot
Sentence 45	olimlarni	S-PER	scientists
Sentence 45	ekspert	S-PER	expert
Sentence 45	sifatida	O	as
Sentence 45	jalb	O	attract
Sentence 45	etish	O	to do
Sentence 45	hamda	O	and
Sentence 45	muhokamalarni	O	discussions
Sentence 45	onlayn	O	online
Sentence 45	tarzda	O	in manner
Sentence 45	o‘tkazish	O	conducting
Sentence 45	amaliyoti	O	practice
Sentence 45	joriy	O	is introduced
Sentence 45	etiladi	O	is done
Sentence 46	Davlat	O	State
Sentence 46	ilmiy	O	scientific
Sentence 46	dasturlari	O	programs
Sentence 46	natijadorligini	O	effectiveness
Sentence 46	oshirish	O	increasing
Sentence 46	bo‘yicha	O	according to
Sentence 46	2023	O	2023
Sentence 46	yil	O	year
Sentence 46	avgustdan	O	from August
Sentence 46	boshlab	O	starting
Sentence 46	quyidagi	O	the following
Sentence 46	tartib	O	procedure
Sentence 46	joriy	O	is introduced
Sentence 46	etilsin	O	shall be
Sentence 47	Fundamental	O	Fundamental
Sentence 47	loyihalar	O	projects
Sentence 47	bo‘yicha	O	according to
Sentence 47	xorijiy	O	foreign
Sentence 47	oliy	O	higher
Sentence 47	ta’lim	O	education
Sentence 47	va	O	and
Sentence 47	ilmiy	O	scientific
Sentence 47	tadqiqot	O	research
Sentence 47	tashkilotlarida	O	in organizations
Sentence 47	faoliyat	O	activity
Sentence 47	ko‘rsatayotgan	O	showing
Sentence 47	va	O	and
Sentence 47	loyiha	O	project
Sentence 47	mavzusi	O	topic
Sentence 47	yo‘nalishida	O	in direction
Sentence 47	muhim	O	significant
Sentence 47	natijalarga	O	results
Sentence 47	erishgan	O	achieved
Sentence 47	Scopus	O	Scopus
Sentence 47	va	O	and
Sentence 47	Web	O	Web
Sentence 47	of	O	of
Sentence 47	Science	O	Science
Sentence 47	xalqaro	O	international
Sentence 47	ilmiy	O	scientific
Sentence 47	ma’lumotlar	O	data
Sentence 47	bazalarida	O	in databases
Sentence 47	Xirsh	O	Hirsch
Sentence 47	indeksi	O	index
Sentence 47	va	O	and
Sentence 47	undan	O	than that
Sentence 47	yuqori	O	higher
Sentence 47	bo‘lgan	O	being
Sentence 47	yetakchi	O	leading
Sentence 47	olimlar	S-PER	scientists
Sentence 47	hamrahbar	O	co
Sentence 47	sifatida	O	as
Sentence 47	jalb	O	involved
Sentence 47	qilinadi	O	are
Sentence 48	Yangi	O	New
Sentence 48	ishlanmalar	O	developments
Sentence 48	asosida	O	based on
Sentence 48	innovatsion	O	innovative
Sentence 48	mahsulotlar	O	products
Sentence 48	ishlab	O	production
Sentence 48	chiqarishni	O	manufacturing
Sentence 48	tashkil	O	organization
Sentence 48	etish	O	to do
Sentence 48	bo‘yicha	O	according to
Sentence 48	Innovatsion	B-ORG	Innovative
Sentence 48	rivojlanish	I-ORG	development
Sentence 48	agentligi	E-ORG	agency
Sentence 48	tarmoq	O	network
Sentence 48	tashkilotlarining	S-ORG	organizations'
Sentence 48	innovatsiyalarga	O	to innovations
Sentence 48	yangi	O	new
Sentence 48	ishlanma	O	development
Sentence 48	va	O	and
Sentence 48	texnologiyalarga	O	technologies
Sentence 48	bo‘lgan	O	being
Sentence 48	ehtiyojlari	O	needs
Sentence 48	asosida	O	based on
Sentence 48	tijoratlashtirish	O	commercialization
Sentence 48	loyihalarini	O	projects
Sentence 48	va	O	and
Sentence 48	innovatsion	O	innovative
Sentence 48	spin	O	spin
Sentence 48	off	O	off
Sentence 48	korxonasi	S-ORG	company
Sentence 48	loyihasini	O	project
Sentence 48	tanlov	O	competition
Sentence 48	asosida	O	based on
Sentence 48	aniqlaydi	O	determines
Sentence 49	Tanlov	O	Competition
Sentence 49	natijalariga	O	according to results
Sentence 49	ko‘ra	O	according to
Sentence 49	g‘olib	O	winner
Sentence 49	deb	O	declared
Sentence 49	topilgan	O	found
Sentence 49	tijoratlashtirish	O	commercialization
Sentence 49	loyihalari	O	projects
Sentence 49	va	O	and
Sentence 49	innovatsion	O	innovative
Sentence 49	spin	O	spin
Sentence 49	off	O	off
Sentence 49	korxonasi	S-ORG	company
Sentence 49	loyihasi	O	project
Sentence 49	Ilm	B-ORG	Science
Sentence 49	fanni	I-ORG	science
Sentence 49	moliyalashtirish	I-ORG	financing
Sentence 49	va	I-ORG	and
Sentence 49	innovatsiyalarni	I-ORG	innovations
Sentence 49	qo‘llab	I-ORG	support
Sentence 49	quvvatlash	I-ORG	assistance
Sentence 49	jamg‘armasi	E-ORG	fund
Sentence 49	mablag‘lari	O	funds
Sentence 49	hisobidan	O	at the expense of
Sentence 49	moliyalashtiriladi	O	are financed
Sentence 50	Innovatsion	O	Innovative
Sentence 50	mahsulotlarni	O	products
Sentence 50	kelgusida	O	in the future
Sentence 50	seriyalab	O	serially
Sentence 50	sanoatda	O	in industry
Sentence 50	ishlab	O	production
Sentence 50	chiqarishni	O	manufacturing
Sentence 50	tashkil	O	organization
Sentence 50	etish	O	to do
Sentence 50	maqsadida	O	with the aim
Sentence 50	tanlov	O	competition
Sentence 50	natijalariga	O	according to results
Sentence 50	ko‘ra	O	according to
Sentence 50	moliyalashtirilgan	O	financed
Sentence 50	har	O	each
Sentence 50	bir	O	one
Sentence 50	tijoratlashtirish	O	commercialization
Sentence 50	loyihasi	O	project
Sentence 50	va	O	and
Sentence 50	innovatsion	O	innovative
Sentence 50	spin	O	spin
Sentence 50	off	O	off
Sentence 50	korxonasi	S-ORG	company
Sentence 50	loyihasi	O	project
Sentence 50	hamda	O	and
Sentence 50	yakunlangan	O	completed
Sentence 50	ilmiy	O	scientific
Sentence 50	loyihalar	O	projects
Sentence 50	tegishli	O	relevant
Sentence 50	tarmoq	B-ORG	network
Sentence 50	korxonasiga	E-ORG	to the enterprise
Sentence 50	biriktiriladi	O	will be assigned
Sentence 51	Tezkor	O	Prompt
Sentence 51	ilmiy	O	scientific
Sentence 51	yechimni	O	solution
Sentence 51	ta’minlash	O	ensuring
Sentence 51	talab	O	required
Sentence 51	etiladigan	O	demanded
Sentence 51	yo‘nalishlar	O	directions
Sentence 51	yuqumli	O	infectious
Sentence 51	kasalliklar	O	diseases
Sentence 51	texnogen	O	technogenic
Sentence 51	holatlar	O	situations
Sentence 51	iqlim	O	climate
Sentence 51	o‘zgarishi	O	change
Sentence 51	va	O	and
Sentence 51	tabiat	O	nature
Sentence 51	hodisalariga	O	phenomena
Sentence 51	oid	O	related
Sentence 51	mikroelektronika	O	microelectronics
Sentence 51	texnologiyalari	O	technologies
Sentence 51	bo‘yicha	O	according to
Sentence 51	yilgacha	O	up to the year
Sentence 51	bo‘lgan	O	being
Sentence 51	qisqa	O	short
Sentence 51	muddatli	O	term
Sentence 51	maqsadli	O	targeted
Sentence 51	amaliy	O	practical
Sentence 51	va	O	and
Sentence 51	innovatsion	O	innovative
Sentence 51	loyihalarni	O	projects
Sentence 51	moliyalashtirish	O	financing
Sentence 51	tartibi	O	procedure
Sentence 51	joriy	O	is introduced
Sentence 51	etiladi	O	is done
Sentence 52	Oliy	B-PER	Higher
Sentence 52	ta’lim	I-PER	education
Sentence 52	fan	I-PER	science
Sentence 52	va	I-PER	and
Sentence 52	innovatsiyalar	I-PER	innovations
Sentence 52	vaziriga	E-PER	to the minister
Sentence 52	bakalavriat	O	bachelor's
Sentence 52	ta’lim	O	education
Sentence 52	yo‘nalishlariga	O	to directions
Sentence 52	mos	O	corresponding
Sentence 52	test	O	test
Sentence 52	sinovi	O	examination
Sentence 52	topshiriladigan	O	to be taken
Sentence 52	fanlar	O	subjects
Sentence 52	majmuasi	O	set
Sentence 52	test	O	test
Sentence 52	topshiriqlari	O	tasks
Sentence 52	soni	O	number
Sentence 52	va	O	and
Sentence 52	baholash	O	evaluation
Sentence 52	mezonlarini	O	criteria
Sentence 52	tasdiqlash	O	approval
Sentence 52	vakolati	O	authority
Sentence 52	berilsin	O	is granted
Sentence 53	Oliy	B-PER	Higher
Sentence 53	ta’lim	I-PER	Education
Sentence 53	fan	I-PER	Science
Sentence 53	va	I-PER	and
Sentence 53	innovatsiyalar	I-PER	Innovations
Sentence 53	vaziriga	E-PER	to the minister
Sentence 53	respublika	B-ORG	Republic
Sentence 53	oliy	I-ORG	Higher
Sentence 53	ta’lim	I-ORG	Education
Sentence 53	tashkilotlariga	E-ORG	to organizations
Sentence 53	qabul	O	Admission
Sentence 53	jarayonida	O	during the process
Sentence 53	kasbiy	O	Professional
Sentence 53	ijodiy	O	Creative
Sentence 53	imtihonlarga	O	to exams
Sentence 53	qo‘yiladigan	O	Set
Sentence 53	umumiy	O	General
Sentence 53	talablarni	O	Requirements
Sentence 53	belgilash	O	Defining
Sentence 53	vakolati	O	Authority
Sentence 53	berilsin	O	Be granted
Sentence 54	Oliy	B-PER	Higher
Sentence 54	ta’lim	I-PER	Education
Sentence 54	fan	I-PER	Science
Sentence 54	va	I-PER	and
Sentence 54	innovatsiyalar	I-PER	Innovations
Sentence 54	vaziriga	E-PER	to the minister
Sentence 54	talabalar	S-PER	Students
Sentence 54	o‘qishini	O	Studies
Sentence 54	ko‘chirish	O	Transfer
Sentence 54	va	O	and
Sentence 54	magistraturaga	O	to master's degree
Sentence 54	kirishda	O	upon admission
Sentence 54	ruxsat	O	Permission
Sentence 54	etiladigan	O	Allowed
Sentence 54	turdosh	O	Related
Sentence 54	ta’lim	O	Education
Sentence 54	yo‘nalishlari	O	Directions
Sentence 54	ro‘yxati	O	List
Sentence 54	hamda	O	and
Sentence 54	o‘rta	O	Secondary
Sentence 54	maxsus	O	Specialized
Sentence 54	professional	O	Professional
Sentence 54	oliy	O	Higher
Sentence 54	va	O	and
Sentence 54	oliy	O	Higher
Sentence 54	ta’limdan	O	Postgraduate
Sentence 54	keyingi	O	Next
Sentence 54	ta’limga	O	to education
Sentence 54	kirishda	O	upon admission
Sentence 54	tan	O	Recognized
Sentence 54	olinadigan	O	Acceptable
Sentence 54	xorijiy	O	Foreign
Sentence 54	tillarni	O	Languages
Sentence 54	bilish	O	Knowledge
Sentence 54	darajasini	O	Level
Sentence 54	belgilovchi	O	Determining
Sentence 54	milliy	O	National
Sentence 54	va	O	and
Sentence 54	xalqaro	O	International
Sentence 54	sertifikatlar	O	Certificates
Sentence 54	ro‘yxatini	O	List
Sentence 54	tasdiqlash	O	Approval
Sentence 54	vakolati	O	Authority
Sentence 54	berilsin	O	Be granted
Sentence 55	Oliy	B-PER	Higher
Sentence 55	ta’lim	I-PER	Education
Sentence 55	fan	I-PER	Science
Sentence 55	va	I-PER	and
Sentence 55	innovatsiyalar	I-PER	Innovations
Sentence 55	vaziriga	E-PER	to the minister
Sentence 55	har	O	Every
Sentence 55	yili	O	Year
Sentence 55	xalqaro	O	International
Sentence 55	va	O	and
Sentence 55	respublika	S-LOC	Republic
Sentence 55	miqyosida	O	At the level
Sentence 55	o‘tkaziladigan	O	Held
Sentence 55	ilmiy	O	Scientific
Sentence 55	va	O	and
Sentence 55	ilmiy	B-ORG	Scientific
Sentence 55	texnik	I-ORG	Technical
Sentence 55	kengashlar	E-ORG	Councils
Sentence 55	rejalarini	O	Plans
Sentence 55	tasdiqlash	O	Approval
Sentence 55	vakolati	O	Authority
Sentence 55	berilsin	O	Be granted
Sentence 56	Oliy	B-ORG	Higher
Sentence 56	ta’lim	I-ORG	Education
Sentence 56	fan	I-ORG	Science
Sentence 56	va	I-ORG	and
Sentence 56	innovatsiyalar	I-ORG	Innovations
Sentence 56	vazirligi	E-ORG	Ministry
Sentence 56	uch	O	Three
Sentence 56	oy	O	Month
Sentence 56	muddatda	O	Within the period
Sentence 56	qonunchilik	O	Legislation
Sentence 56	hujjatlariga	O	Documents
Sentence 56	ushbu	O	This
Sentence 56	qarordan	O	From the decision
Sentence 56	kelib	O	Arising
Sentence 56	chiqadigan	O	Emerging
Sentence 56	o‘zgartirish	O	Changes
Sentence 56	va	O	and
Sentence 56	qo‘shimchalar	O	Additions
Sentence 56	to‘g‘risida	O	About
Sentence 56	Vazirlar	B-ORG	Cabinet
Sentence 56	Mahkamasiga	E-ORG	of Ministers
Sentence 56	takliflar	O	Proposals
Sentence 56	kiritsin	O	Submit
Sentence 57	Mazkur	O	This
Sentence 57	qarorning	O	Decision's
Sentence 57	ijrosini	O	Implementation
Sentence 57	samarali	O	Effective
Sentence 57	tashkil	O	Organization
Sentence 57	qilishga	O	To do
Sentence 57	mas’ul	O	Responsible
Sentence 57	va	O	and
Sentence 57	shaxsiy	O	Personal
Sentence 57	javobgar	O	Liable
Sentence 57	etib	O	As
Sentence 57	oliy	B-PER	Higher
Sentence 57	ta’lim	I-PER	Education
Sentence 57	fan	I-PER	Science
Sentence 57	va	I-PER	and
Sentence 57	innovatsiyalar	I-PER	Innovations
Sentence 57	vaziri	E-PER	Minister
Sentence 58	Mengliyev	S-PER	Mengliyev
Sentence 58	belgilansin	O	Be appointed
Sentence 59	Qaror	O	Decision
Sentence 59	ijrosini	O	Execution
Sentence 59	muhokama	O	Discussion
Sentence 59	qilib	O	Doing
Sentence 59	borish	O	Proceeding
Sentence 59	mas’ul	B-ORG	Responsible
Sentence 59	tashkilotlar	E-ORG	Organizations
Sentence 59	faoliyatini	O	Activities
Sentence 59	muvofiqlashtirish	O	Coordination
Sentence 59	va	O	and
Sentence 59	nazorat	O	Control
Sentence 59	qilish	O	To do
Sentence 59	O‘zbekiston	B-LOC	Uzbekistan
Sentence 59	Respublikasining	E-LOC	Republic's
Sentence 59	Bosh	B-PER	Prime
Sentence 59	vaziri	E-PER	Minister
Sentence 60	Mengliyev	S-PER	Mengliyev
Sentence 60	va	O	and
Sentence 60	O‘zbekiston	B-LOC	Uzbekistan
Sentence 60	Respublikasi	E-LOC	Republic's
Sentence 60	Prezidentining	B-PER	President's
Sentence 60	maslahatchisi	E-PER	Advisor
Sentence 61	Ibragimov	S-PER	Ibragimov
Sentence 61	zimmasiga	O	Assigned to
Sentence 61	yuklansin	O	Be entrusted
Sentence 62	Oliy	O	Higher
Sentence 62	ta’lim	O	Education
Sentence 62	oliy	O	Higher
Sentence 62	ta’limdan	O	Postgraduate
Sentence 62	keyingi	O	Next
Sentence 62	ta’lim	O	Education
Sentence 62	ilm	O	Science
Sentence 62	fan	O	Science
Sentence 62	va	O	and
Sentence 62	innovatsion	O	Innovative
Sentence 62	faoliyat	O	Activity
Sentence 62	o‘rta	O	Secondary
Sentence 62	maxsus	O	Specialized
Sentence 62	professional	O	Professional
Sentence 62	ta’lim	O	Education
Sentence 62	sohalarida	O	In fields
Sentence 62	yagona	O	Unified
Sentence 62	davlat	O	State
Sentence 62	siyosatini	O	Policy
Sentence 62	amalga	O	Implementation
Sentence 62	oshirish	O	To carry out
Sentence 62	shuningdek	O	As well as
Sentence 62	sohalarni	O	Sectors
Sentence 62	strategik	O	Strategic
Sentence 62	rivojlantirish	O	Development
Sentence 62	yo‘nalishlarini	O	Directions
Sentence 62	belgilash	O	Determining
Sentence 62	vazirlik	S-ORG	Ministry's
Sentence 62	faoliyatining	O	Activity's
Sentence 62	ustuvor	O	Priority
Sentence 62	yo‘nalishlaridan	O	Directions
Sentence 62	biri	O	One
Sentence 62	hisoblanadi	O	Is considered
Sentence 63	O‘rta	O	Secondary
Sentence 63	maxsus	O	Specialized
Sentence 63	professional	O	Professional
Sentence 63	oliy	O	Higher
Sentence 63	ta’lim	O	Education
Sentence 63	va	O	and
Sentence 63	oliy	O	Higher
Sentence 63	ta’limdan	O	Postgraduate
Sentence 63	keyingi	O	Next
Sentence 63	ta’lim	O	Education
Sentence 63	xizmatlarini	O	Services
Sentence 63	ko‘rsatish	O	Providing
Sentence 63	sohasidagi	O	In the field
Sentence 63	faoliyatni	O	Activity
Sentence 63	litsenziyalash	O	Licensing
Sentence 63	shuningdek	O	As well as
Sentence 63	kadrlar	O	Personnel
Sentence 63	malakasini	O	Qualification
Sentence 63	oshirish	O	Increasing
Sentence 63	va	O	and
Sentence 63	ularni	O	Their
Sentence 63	qayta	O	Re
Sentence 63	tayyorlash	O	Training
Sentence 63	faoliyatini	O	Activity
Sentence 63	tartibga	O	Regulation
Sentence 63	solish	O	To establish
Sentence 63	vazirlik	S-ORG	Ministry's
Sentence 63	faoliyatining	O	Activity's
Sentence 63	ustuvor	O	Priority
Sentence 63	yo‘nalishlaridan	O	Directions
Sentence 63	biri	O	One
Sentence 63	hisoblanadi	O	Is considered
Sentence 63	Xalqaro	O	International
Sentence 63	mezonlar	O	Criteria
Sentence 63	asosida	O	Based on
Sentence 63	o‘rta	O	Secondary
Sentence 63	maxsus	O	Specialized
Sentence 63	professional	O	Professional
Sentence 63	va	O	and
Sentence 63	oliy	B-ORG	Higher
Sentence 63	ta’lim	I-ORG	Education
Sentence 63	muassasalarida	E-ORG	In institutions
Sentence 63	ta’lim	O	Education
Sentence 63	sifatini	O	Quality
Sentence 63	ta’minlash	O	Ensuring
Sentence 63	o‘quv	O	Educational
Sentence 63	jarayonini	O	Process
Sentence 63	tashkil	O	Organization
Sentence 63	etish	O	To do
Sentence 63	me’yorlarini	O	Standards
Sentence 63	belgilash	O	Defining
Sentence 63	hamda	O	And
Sentence 63	ta’lim	O	Education
Sentence 63	tashkilotlarining	S-ORG	Organizations'
Sentence 63	boshqaruv	O	Management
Sentence 63	va	O	and
Sentence 63	pedagog	B-PER	Pedagogical
Sentence 63	kadrlarining	E-PER	Staff's
Sentence 63	kasbiy	O	Professional
Sentence 63	ko‘nikmalarini	O	Skills
Sentence 63	rivojlantirish	O	Development
Sentence 63	vazirlik	S-ORG	Ministry's
Sentence 63	faoliyatining	O	Activity's
Sentence 63	ustuvor	O	Priority
Sentence 63	yo‘nalishlaridan	O	Directions
Sentence 63	biri	O	One
Sentence 63	hisoblanadi	O	Is considered
Sentence 63	O‘rta	O	Secondary
Sentence 63	maxsus	O	Specialized
Sentence 63	professional	O	Professional
Sentence 63	va	O	and
Sentence 63	oliy	O	Higher
Sentence 63	ta’limning	O	Education's
Sentence 63	ma’naviy	O	Spiritual
Sentence 63	axloqiy	O	Moral
Sentence 63	mazmunini	O	Content
Sentence 63	kuchaytirish	O	Strengthening
Sentence 63	yoshlarni	O	Youth
Sentence 63	mustaqillik	O	Independence
Sentence 63	g‘oyalariga	O	Ideas
Sentence 63	sadoqat	O	Loyalty
Sentence 63	milliy	O	National
Sentence 63	qadriyatlarga	O	Values
Sentence 63	hurmat	O	Respect
Sentence 63	insonparvarlik	O	Humanism
Sentence 63	va	O	and
Sentence 63	yuksak	O	High
Sentence 63	ma’naviy	O	Spiritual
Sentence 63	g‘oyalar	O	Ideas
Sentence 63	asosida	O	Based on
Sentence 63	vatanparvarlik	O	Patriotism
Sentence 63	ruhida	O	In the spirit
Sentence 63	tarbiyalash	O	Educating
Sentence 63	vazirlik	S-ORG	Ministry's
Sentence 63	faoliyatining	O	Activity's
Sentence 63	ustuvor	O	Priority
Sentence 63	yo‘nalishlaridan	O	Directions
Sentence 63	biri	O	One
Sentence 63	hisoblanadi	O	Is considered
Sentence 64	Ilmiy	O	Scientific
Sentence 64	tadqiqot	O	Research
Sentence 64	ishlari	O	Works
Sentence 64	samaradorligini	O	Efficiency
Sentence 64	oshirish	O	Increasing
Sentence 64	davlat	O	State
Sentence 64	ilmiy	O	Scientific
Sentence 64	va	O	and
Sentence 64	innovatsion	O	Innovative
Sentence 64	dasturlari	O	Programs
Sentence 64	ijrosini	O	Implementation
Sentence 64	muvofiqlashtirish	O	Coordination
Sentence 64	shuningdek	O	As well as
Sentence 64	ta’lim	O	Education
Sentence 64	ilm	O	Science
Sentence 64	fan	O	Science
Sentence 64	va	O	and
Sentence 64	ishlab	O	Production
Sentence 64	chiqarish	O	Manufacturing
Sentence 64	o‘rtasida	O	Between
Sentence 64	integratsiyani	O	Integration
Sentence 64	ta’minlash	O	Ensuring
Sentence 64	vazirlik	S-ORG	Ministry's
Sentence 64	faoliyatining	O	Activity's
Sentence 64	ustuvor	O	Priority
Sentence 64	yo‘nalishlaridan	O	Directions
Sentence 64	biri	O	One
Sentence 64	hisoblanadi	O	Is considered
Sentence 65	O‘rta	O	Secondary
Sentence 65	maxsus	O	Specialized
Sentence 65	professional	O	Professional
Sentence 65	oliy	O	Higher
Sentence 65	ta’lim	O	Education
Sentence 65	oliy	O	Higher
Sentence 65	ta’limdan	O	Postgraduate
Sentence 65	keyingi	O	Next
Sentence 65	ta’lim	O	Education
Sentence 65	fan	O	Science
Sentence 65	va	O	and
Sentence 65	innovatsiyalar	O	Innovations
Sentence 65	sohasida	O	In the field
Sentence 65	qo‘shma	O	Joint
Sentence 65	ta’lim	O	Education
Sentence 65	va	O	and
Sentence 65	ilmiy	O	Scientific
Sentence 65	dasturlarni	O	Programs
Sentence 65	amalga	O	Implementation
Sentence 65	oshirish	O	To carry out
Sentence 65	bo‘yicha	O	Regarding
Sentence 65	xalqaro	O	International
Sentence 65	aloqalarni	O	Relations
Sentence 65	rivojlantirish	O	Development
Sentence 65	vazirlik	S-ORG	Ministry's
Sentence 65	faoliyatining	O	Activity's
Sentence 65	ustuvor	O	Priority
Sentence 65	yo‘nalishlaridan	O	Directions
Sentence 65	biri	O	One
Sentence 65	hisoblanadi	O	Is considered
Sentence 66	Ilm	O	Science
Sentence 66	fan	O	Science
Sentence 66	va	O	and
Sentence 66	texnologiyalarni	O	Technologies
Sentence 66	rivojlantirishning	O	Development's
Sentence 66	ustuvor	O	Priority
Sentence 66	yo‘nalishlari	O	Directions
Sentence 66	asosida	O	Based on
Sentence 66	davlat	O	State
Sentence 66	ilmiy	O	Scientific
Sentence 66	dasturlarini	O	Programs
Sentence 66	shakllantirish	O	Formation
Sentence 66	ilmiy	O	Scientific
Sentence 66	darajali	O	Degree
Sentence 66	kadrlarni	O	Personnel
Sentence 66	tayyorlash	O	Training
Sentence 66	tizimini	O	System
Sentence 66	muvofiqlashtirish	O	Coordination
Sentence 66	vazirlik	S-ORG	Ministry's
Sentence 66	faoliyatining	O	Activity's
Sentence 66	ustuvor	O	Priority
Sentence 66	yo‘nalishlaridan	O	Directions
Sentence 66	biri	O	One
Sentence 66	hisoblanadi	O	Is considered
Sentence 67	Ta’lim	O	Education
Sentence 67	ilm	O	Science
Sentence 67	fan	O	Science
Sentence 67	va	O	and
Sentence 67	ishlab	O	Production
Sentence 67	chiqarish	O	Manufacturing
Sentence 67	integratsiyasini	O	Integration
Sentence 67	mustahkamlash	O	Strengthening
Sentence 67	yangi	O	New
Sentence 67	ishlanmalarni	O	Developments
Sentence 67	tijoratlashtirish	O	Commercialization
Sentence 67	ratsionalizatorlik	O	Rationalization
Sentence 67	faoliyati	O	Activity
Sentence 67	va	O	and
Sentence 67	startap	O	Startup
Sentence 67	ekotizimini	O	Ecosystem
Sentence 67	rivojlantirish	O	Development
Sentence 67	vazirlik	S-ORG	Ministry's
Sentence 67	faoliyatining	O	Activity's
Sentence 67	ustuvor	O	Priority
Sentence 67	yo‘nalishlaridan	O	Directions
Sentence 67	biri	O	One
Sentence 67	hisoblanadi	O	Is considered
Sentence 68	OKOZ	O	OKOZ
Sentence 68	12	O	12
Sentence 68	00	O	0
Sentence 68	00	O	0
Sentence 68	00	O	0
Sentence 68	Axborot	O	Information
Sentence 68	va	O	and
Sentence 68	axborotlashtirish	O	Informatization
Sentence 68	12	O	12
Sentence 68	02	O	2
Sentence 68	00	O	0
Sentence 68	00	O	0
Sentence 68	Axborot	O	Information
Sentence 68	va	O	and
Sentence 68	axborotlashtirish	O	Informatization
Sentence 68	sohasida	O	In the field
Sentence 68	boshqaruv	O	Management
Sentence 69	Elektron	O	Electronic
Sentence 69	hukumat	S-ORG	Government
Sentence 69	Axborotlashtirishni	O	Informatization
Sentence 69	hokimiyat	B-ORG	Authority
Sentence 69	organlari	E-ORG	Bodies
Sentence 69	12	O	12
Sentence 69	00	O	0
Sentence 69	00	O	0
Sentence 69	00	O	0
Sentence 69	Axborot	O	Information
Sentence 69	va	O	and
Sentence 69	axborotlashtirish	O	Informatization
Sentence 69	12	O	12
Sentence 69	03	O	3
Sentence 69	00	O	0
Sentence 69	00	O	0
Sentence 69	Axborot	O	Information
Sentence 69	resurslari	O	Resources
Sentence 70	Axborot	O	Information
Sentence 70	resurslaridan	O	From resources
Sentence 70	foydalanish	O	Use
Sentence 70	12	O	12
Sentence 70	03	O	3
Sentence 70	08	O	8
Sentence 70	00	O	0
Sentence 70	Axborotni	O	Information
Sentence 70	taqdim	O	Presentation
Sentence 70	qilish	O	Providing
Sentence 71	Axborot	O	Information
Sentence 71	xizmatlari	O	Services
Sentence 71	TSZ	O	TSZ
Sentence 71	Iqtisodiyot	O	Economy
Sentence 71	Axborot	O	Information
Sentence 71	va	O	and
Sentence 71	axborotlashtirish	O	Informatization
Sentence 72	Elektron	O	Electronic
Sentence 72	tijorat	O	Commerce
Sentence 72	hujjat	O	Document
Sentence 72	aylanishi	O	Circulation
Sentence 72	O‘zbekiston	B-LOC	Uzbekistan
Sentence 72	Respublikasi	E-LOC	Republic
Sentence 72	Vazirlar	B-ORG	Cabinet
Sentence 72	Mahkamasining	E-ORG	of Ministers
Sentence 72	qarori	O	Decision
Sentence 72	O‘zbekiston	S-LOC	Uzbekistan
Sentence 72	Milliy	B-ORG	National
Sentence 72	axborot	I-ORG	Information
Sentence 72	agentligi	E-ORG	Agency
Sentence 72	faoliyatini	O	Activities
Sentence 72	qo'llab	O	Supporting
Sentence 72	quvvatlash	O	Support
Sentence 72	to'g'risida	O	About
Sentence 72	O‘zbekiston	B-LOC	Uzbekistan
Sentence 72	Respublikasi	E-LOC	Republic's
Sentence 72	Prezidentining	S-PER	President's
Sentence 72	O‘zbekiston	S-LOC	Uzbekistan
Sentence 72	Milliy	B-ORG	National
Sentence 72	axborot	I-ORG	Information
Sentence 72	agentligi	E-ORG	Agency
Sentence 72	faoliyatini	O	Activities
Sentence 72	yanada	O	Further
Sentence 72	takomillashtirish	O	Improvement
Sentence 72	chora	O	Measures
Sentence 72	tadbirlari	O	Actions
Sentence 72	to‘g‘risida	O	About
Sentence 72	2019	O	2019
Sentence 72	yil	O	Year
Sentence 72	dekabrdagi	O	December
Sentence 72	PQ	O	PQ
Sentence 72	4541	O	4541
Sentence 72	son	O	Number
Sentence 72	qarori	O	Decision
Sentence 72	ijrosini	O	Execution
Sentence 72	ta’minlash	O	Ensuring
Sentence 72	maqsadida	O	For the purpose
Sentence 72	Vazirlar	B-ORG	Cabinet
Sentence 72	Mahkamasi	E-ORG	of Ministers
Sentence 72	qaror	O	Decision
Sentence 72	qiladi	O	Makes
Sentence 73	O‘zbekiston	S-LOC	Uzbekistan
Sentence 73	Milliy	B-ORG	National
Sentence 73	axborot	I-ORG	Information
Sentence 73	agentligi	E-ORG	Agency
Sentence 73	keyingi	O	Further
Sentence 73	o‘rinlarda	O	In places
Sentence 73	O‘zA	S-ORG	O‘zA
Sentence 73	deb	O	Called
Sentence 73	ataladi	O	Is called
Sentence 73	to‘g‘risida	O	About
Sentence 73	nizom	O	Regulation
Sentence 73	ilovaga	O	To the appendix
Sentence 73	muvofiq	O	According
Sentence 73	tasdiqlansin	O	Be approved
Sentence 74	O‘zbekiston	B-LOC	Uzbekistan
Sentence 74	Respublikasi	E-LOC	Republic's
Sentence 74	Moliya	B-ORG	Finance
Sentence 74	vazirligi	E-ORG	Ministry
Sentence 74	Qoraqalpog‘iston	S-LOC	Karakalpakstan
Sentence 74	axborot	B-ORG	Information
Sentence 74	agentligi	E-ORG	Agency
Sentence 74	hamda	O	And
Sentence 74	O‘zAning	S-ORG	Of O‘zA
Sentence 74	viloyatlardagi	S-LOC	In regions
Sentence 74	mintaqaviy	O	Regional
Sentence 74	muxbirlik	B-ORG	Correspondent
Sentence 74	punktlari	E-ORG	Points
Sentence 74	uchun	O	For
Sentence 74	tadan	O	From
Sentence 74	yengil	O	Light
Sentence 74	avtotransport	O	Vehicles
Sentence 74	vositasi	O	Means
Sentence 74	xarid	O	Purchase
Sentence 74	qilish	O	To do
Sentence 74	uchun	O	For
Sentence 74	mablag	O	Funds
Sentence 74	ajratsin	O	Allocate
Sentence 76	O‘zbekiston	S-LOC	Uzbekistan
Sentence 76	Milliy	B-ORG	National
Sentence 76	axborot	I-ORG	Information
Sentence 76	agentligiga	E-ORG	To the agency
Sentence 76	22	O	22
Sentence 76	ta	O	Units
Sentence 76	shu	O	This
Sentence 76	jumladan	O	Including
Sentence 76	ta	O	Units
Sentence 76	shaxsiy	O	Personal
Sentence 76	biriktirilgan	O	Assigned
Sentence 76	ta	O	Units
Sentence 76	navbatchi	O	Duty
Sentence 76	va	O	And
Sentence 76	12	O	12
Sentence 76	ta	O	Units
Sentence 76	mintaqaviy	O	Regional
Sentence 76	muxbirlik	B-ORG	Correspondent
Sentence 76	punktlariga	E-ORG	To points
Sentence 76	biriktirilgan	O	Assigned
Sentence 76	yengil	O	Light
Sentence 76	avtotransport	O	Vehicles
Sentence 76	vositasini	O	Means
Sentence 76	Qoraqalpog‘iston	S-LOC	Karakalpakstan
Sentence 76	axborot	B-ORG	Information
Sentence 76	agentligiga	E-ORG	To the agency
Sentence 76	ta	O	Units
Sentence 76	navbatchi	S-PER	Duty
Sentence 76	xizmat	O	Service
Sentence 76	yengil	O	Light
Sentence 76	avtotransport	O	Vehicles
Sentence 76	vositasini	O	Means
Sentence 76	saqlash	O	Maintaining
Sentence 76	uchun	O	For
Sentence 76	limit	O	Limit
Sentence 76	ajratsin	O	Allocate
Sentence 77	O‘zbekiston	B-LOC	Uzbekistan
Sentence 77	Respublikasi	E-LOC	Republic's
Sentence 77	Hukumatining	S-ORG	Government's
Sentence 77	ayrim	O	Certain
Sentence 77	qarorlari	O	Decisions
Sentence 77	ilovaga	O	To the appendix
Sentence 77	muvofiq	O	According
Sentence 77	o‘z	O	Own
Sentence 77	kuchini	O	Force
Sentence 77	yo‘qotgan	O	Lost
Sentence 77	deb	O	Is considered
Sentence 77	hisoblansin	O	Be considered
Sentence 78	Vazirliklar	S-ORG	Ministries
Sentence 78	va	O	And
Sentence 78	idoralar	S-ORG	Agencies
Sentence 78	o‘zlari	O	Themselves
Sentence 78	qabul	O	Adopted
Sentence 78	qilgan	O	Made
Sentence 78	normativ	O	Normative
Sentence 78	huquqiy	O	Legal
Sentence 78	hujjatlarni	O	Documents
Sentence 78	bir	O	One
Sentence 78	oy	O	Month
Sentence 78	muddatda	O	Within
Sentence 78	ushbu	O	This
Sentence 78	qarorga	O	Decision
Sentence 78	muvofiqlashtirsinlar	O	Harmonize
Sentence 79	Ushbu	O	This
Sentence 79	qarorning	O	Decision's
Sentence 79	bajarilishini	O	Execution
Sentence 79	nazorat	O	Control
Sentence 79	qilish	O	To do
Sentence 79	O‘zbekiston	S-LOC	Uzbekistan
Sentence 79	Milliy	B-ORG	National
Sentence 79	axborot	I-ORG	Information
Sentence 79	agentligi	E-ORG	Agency
Sentence 79	bosh	B-PER	Head
Sentence 79	direktori	E-PER	Director
Sentence 79	Ko‘chimov	O	Ko‘chimov
Sentence 79	zimmasiga	O	Responsibility
Sentence 79	hamda	O	And
Sentence 79	Vazirlar	B-ORG	Cabinet
Sentence 79	Mahkamasining	E-ORG	of Ministers
Sentence 79	Yoshlar	O	Youth
Sentence 79	siyosati	O	Policy
Sentence 79	madaniyat	B-LOC	Culture
Sentence 79	markazini	E-LOC	Center
Sentence 79	ommaviy	B-ORG	Mass
Sentence 79	axborot	I-ORG	Information
Sentence 79	vositalari	E-ORG	Means
Sentence 79	ijodiy	O	Creative
Sentence 79	va	O	And
Sentence 79	jamoat	O	Public
Sentence 79	tashkilotlari	S-ORG	Organizations
Sentence 79	masalalari	O	Issues
Sentence 79	o‘rinbosari	S-PER	Deputy
Sentence 79	ga	O	To
Sentence 79	yuklansin	O	Be assigned
Sentence 80	O‘zbekiston	B-LOC	Uzbekistan
Sentence 80	Respublikasining	E-LOC	Republic's
Sentence 80	Bosh	B-PER	Prime
Sentence 80	vaziri	E-PER	Minister
Sentence 80	Mengliyev	S-PER	Mengliyev
Sentence 80	va	O	And
Sentence 80	O‘zbekiston	B-LOC	Uzbekistan
Sentence 80	Respublikasi	E-LOC	Republic's
Sentence 80	Prezidentining	B-PER	President's
Sentence 80	maslahatchisi	E-PER	Advisor
Sentence 80	Ibragimov	S-PER	Ibragimov
Sentence 80	Vazirlar	B-ORG	Cabinet
Sentence 80	Mahkamasining	E-ORG	of Ministers
Sentence 80	2020	O	2020
Sentence 80	yil	O	Year
Sentence 80	yanvardagi	O	January
Sentence 80	son	O	Number
Sentence 80	qaroriga	O	Decision
Sentence 80	ILOVA	O	Appendix
Sentence 80	O‘zbekiston	S-LOC	Uzbekistan
Sentence 80	Milliy	B-ORG	National
Sentence 80	axborot	I-ORG	Information
Sentence 80	agentligi	E-ORG	Agency
Sentence 80	to‘g‘risida	O	About
Sentence 80	NIZOM	O	Regulation
Sentence 80	bob	O	Chapter
Sentence 81	Umumiy	O	General
Sentence 81	qoidalar	O	Provisions
Sentence 82	Ushbu	O	This
Sentence 82	Nizom	O	Regulation
Sentence 82	O‘zbekiston	S-LOC	Uzbekistan
Sentence 82	Milliy	B-ORG	National
Sentence 82	axborot	I-ORG	Information
Sentence 82	agentligining	E-ORG	Agency's
Sentence 82	keyingi	O	Next
Sentence 82	o‘rinlarda	O	In places
Sentence 82	O‘zA	S-ORG	O‘zA
Sentence 82	deb	O	Called
Sentence 82	ataladi	O	Is called
Sentence 82	maqomi	O	Status
Sentence 82	asosiy	O	Main
Sentence 82	vazifalari	O	Tasks
Sentence 82	funksiyalari	O	Functions
Sentence 82	huquqlari	O	Rights
Sentence 82	javobgarligi	O	Responsibilities
Sentence 82	faoliyatini	O	Activities
Sentence 82	tashkil	O	Organization
Sentence 82	etish	O	To do
Sentence 82	va	O	And
Sentence 82	hisobot	O	Reporting
Sentence 82	berish	O	Providing
Sentence 82	tartibini	O	Procedure
Sentence 82	shuningdek	O	As well as
Sentence 82	rahbarlarining	S-PER	Leaders'
Sentence 82	funksional	O	Functional
Sentence 82	vazifalari	O	Tasks
Sentence 82	va	O	And
Sentence 82	mas’uliyatini	O	Responsibilities
Sentence 82	belgilaydi	O	Determines
Sentence 83	O‘zA	S-ORG	O‘zA
Sentence 83	mamlakatimizning	S-LOC	Of our country
Sentence 83	ichki	O	Internal
Sentence 83	va	O	And
Sentence 83	tashqi	O	External
Sentence 83	siyosatini	O	Policy
Sentence 83	jamiyatimizda	O	In our society
Sentence 83	kechayotgan	O	Ongoing
Sentence 83	ijtimoiy	O	Social
Sentence 83	iqtisodiy	O	Economic
Sentence 83	o‘zgarishlar	O	Changes
Sentence 83	va	O	And
Sentence 83	yangilanishlarni	O	Reforms
Sentence 83	amalga	O	Implementation
Sentence 83	oshirilayotgan	O	Being carried out
Sentence 83	tub	O	Fundamental
Sentence 83	islohotlarning	O	Reforms'
Sentence 83	mohiyati	O	Essence
Sentence 83	ahamiyati	O	Importance
Sentence 83	va	O	And
Sentence 83	samaralarini	O	Results
Sentence 83	ommaviy	B-ORG	Mass
Sentence 83	axborot	I-ORG	Information
Sentence 83	vositalarida	E-ORG	In media
Sentence 83	xolis	O	Objective
Sentence 83	izchil	O	Consistent
Sentence 83	va	O	And
Sentence 83	O‘zbekiston	B-LOC	Uzbekistan
Sentence 83	Respublikasining	E-LOC	Republic's
Sentence 83	milliy	O	National
Sentence 83	manfaatlari	O	Interests
Sentence 83	nuqtai	O	Point
Sentence 83	nazaridan	O	From view
Sentence 83	yoritadigan	O	Highlighting
Sentence 83	rasmiy	O	Official
Sentence 83	davlat	S-LOC	State
Sentence 83	axborot	B-ORG	Information
[truncated: 32,911 more rows]
[truncated: 1 more columns]

## Sheet: Лист2
Unnamed:
Qirg‘iziston	Kyrgyzstan
va	and
O‘zbekiston	Uzbekistan
o‘rtasida	between
uchrashuv	meeting
bo‘lib	being/having
o‘tdi	took
Turkiya	Turkey
va	and
Qozog‘iston	Kazakhstan
memorandum	memorandum
imzolandi	was
Qashqadaryo	Qashqadaryo
viloyati	region
Surxondaryo	Surxondaryo
Qoraqalpog‘iston	Karakalpakstan
Respublikasida	in Republic
o‘tgan	took
tadbirda	at event
Samarqand	Samarkand
shahri	city
delegatsiyasi	delegation
ishtirok	participation
etdi	participated
Namangan	Namangan
Farg‘ona	Fergana
viloyatlari	regions
savdo	trade
aloqalari	relations
kengaytirildi	were
Xitoy	China
teleko‘prik	teleconference
o‘tkazildi	was
Fransiyada	in
harbiy	military
mashg‘ulotlar	exercises
shahrida	in city of
esa	while
ilmiy	scientific
anjuman	conference
tashkil	organized
etildi	was
Rossiya	Russia
O‘zbekistondan	from
Rossiyagacha	to
Turkmaniston	Turkmenistan
Tojikiston	Tajikistan
madaniy	cultural
dastur	program
ishga	into
tushirildi	was
Markaziy	Central
Osiyoda	in
ko‘rgazma	exhibition
ochildi	opened
Buxoro	Bukhara
viloyatida	in region	region
Rossiyada	in
Xiva	Khiva
investitsiya	investment
forumi	forum
Andijon	Andijan
bilan	with
Toshkent	Tashkent
yangi	new
avtobekatlar	bus
Nukus	Nukus
iqtisodiy	economic
forum	forum
qilindi	was
Xorazm	Khorezm
Germaniya	Germany
Osiyo	Asia
Germaniyada	in
Qo‘qon	Kokand
viloyatidan	from region	region
viloyatigacha	to region	region
hamda	and
Yevropa	Europe
AQSh	USA
qo‘shma	joint
tadbir	event
Respublikasi	Republic
strategik	strategic
hamkorlik	cooperation
bitimi	agreement
Moskva	Moscow
Prezident	President
Shavkat	Shavkat
Mirziyoyev	Mirziyoyev
Emomali	Emomali
Rahmon	Rahmon
muloqot	dialogue
qildi	held
Vladimir	Vladimir
Putin	Putin
telefon	phone
orchali	via
Abdulla	Abdulla
Aripov	Aripov
Jamshid	Jamshid
Qo‘chqorov	Qochqarov
loyihani	the
muhokama	discussion
Sherzod	Sherzod
Shermatov	Shermatov
Saida	Saida
Mirziyoyeva	Mirziyoyeva
brifing	briefing
o‘tkazdi	held
Islom	Islam
Karimov	Karimov
Nursulton	Nursultan
Nazarboyev	Nazarbayev
do‘stona	friendly
Angela	Angela
Merkel	Merkel
Joe	Joe
Biden	Biden
xalqaro	international
sammitda	at summit	summit
uchrashdi	met
Narendra	Narendra
Modi	Modi
Ilhom	Ilham
Aliyev	Aliyev
hamkorlikni	cooperation
Sadyr	Sadyr
Japarov	Japarov
chegara	border
masalasini	issue
Abdulaziz	Abdulaziz
Kamilov	Kamilov
Sergey	Sergey
Lavrov	Lavrov
uchrashuvda	at meeting	meeting
Komil	Komil
Allamjonov	Allamjonov
Akmal	Akmal
Saidov	Saidov
tashabbusni	the
e’lon	announced
Dilshoda	Dilshoda
Saydullaeva	Saydullaeva
Nigora	Nigora
Xolova	Kholova
tanlovda	in competition	competition
g‘olib	winner
chiqdi	became
Rustam	Rustam
Azizov	Azizov
Gulnoza	Gulnoza
Karimova	Karimova
konferensiyada	at conference	conference
ma’ruza	speech
Temur	Temur
Soliyev	Soliyev
Dilorom	Dilorom
Olimova	Olimova
mukofot	award
taqdirlandi	was
Majlisda	at meeting	meeting
Xurshid	Xurshid
Do‘stmuhamedov	Dostmuhamedov
Omon	Omon
Matjonov	Matjonov
taklif	proposal
bildirdi	put
Barno	Barno
Abdurashidova	Abdurashidova
Zuhra	Zuhra
Tursunova	Tursunova
lavozimlarga	positions
tayinlandi	were
Allamjonovni	Allamjonov
yuqori	high
lavozimga	to position	position	#REF!
tayinladi	appointed
Saidovni	Saidov
taqdirladi	awarded
Shermatovni	Shermatov
qabul	reception
videomuloqot	video
Emmanuel	Emmanuel
Makron	Macron
muzokara	negotiations
olib	held
bordi	conducted
imzoladi	signed
rasmiy	official
hujjatni	document
Alisher	Alisher
Qodirov	Qodirov
matbuot	press
anjumanida	at conference	conference	at conference conference
qatnashdi	participated
loyiha	project
ustida	on
ish	work
ijtimoiy	social
boshladi	started
va	and
o‘zaro	mutual
aloqalar	connections
uchun	for
intensiv	intensive
rivojlanish	development
Turkiyada	in
kecha	yesterday
o‘tkazilgan	held
yig‘ilish	meeting
qatnashdi	participated
davlatlar	states
o‘rtasidagi	between
Diplomatik	diplomatic
munosabatlar	relations
hundan-fazla	more
mamlakatlar	countries
birdam	united
sa’y-harakatlar	efforts
bilan	with
amalga	implemented
oshirildi	increased
tarixiy	historical
ahamiyat	importance
ta’kidladi	emphasized
maqsad	purpose
tinchlik	peace
barqarorlik	stability
ta’minlash	to
ijtimoiy-iqtisodiy	socio-economic
o‘sish	growth
sheriklik	partnership
kelishuv	agreement
asnosida	on basis	basis
imzolash	signing
rejalashtirildi	was
konferensiya	conference
dunyo	world
miqyosida	worldwide
translyatsiya	broadcast
qilindi	was
ilmiy-tadqiqot	scientific-research
markazi	center
rasman	officially
ishga	into
tushdi	launched
ShHT	SCO
sammiti	summit
Do‘rmon	Dormon
ko‘shkida	at palace	palace
o‘tkazilmoqda	is held	held
yakunlanadi	will
ertalab	in morning	morning
tashrif	visit
uyushtirildi	was
mahalliy	local
fuqarolar	citizens
qabulida	at reception	reception	at reception reception
ishtirok	participation
etish	to part	part	#REF!
so‘rovnomaning	of survey	survey	#REF!
natijalari	results
barcha	all
platformalarda	platforms
ommalashtirildi	were
ichki	internal
ishlar	affairs
vaziri	minister
yechim	solution
izlab	finding
ko‘plab	many
muammolar	problems
bilan	with
bog‘liq	related
holat	condition
o‘rganildi	was
turli	various
takliflar	proposals
tayyorlandi	were
Mudofaa	Defense
vazirligi	Ministry
tasdiqladi	approved
navbatdagi	next
rejalarni	plans
Shuningdek	Moreover
milliy	national
xavfsizlik	security
masalalari	issues
muhokama	discussion
markazida	at center	center	#REF!
bo‘ldi	took
yangi	new
loyihalar	projects
ishlanmoqda	are developed	developed	#REF!
Hukumat	Government
portalida	on portal	portal	#REF!
e’lon	announcement
qilindi	was
vazifalar	tasks
ro‘yxati	list
ochiq	open
tarzda	publicly
taqdim	provided
etildi	was
xalq	people
bilan	with
muloqot	dialogue
uchun	for
imkoniyat	opportunity
yaratildi	was
investorlar	investors
kelib	arriving
ketmoqda	are
ilg‘or	advanced
texnologiyalar	technologies
joriy	introduced
etilmoqda	are introduced	introduced	#REF!
nazorat	control
kuchaytirildi	was
barcha	all
sohalarda	fields
ijobiy	positive
o‘zgarishlar	changes
kuzatilmoqda	are
diplomatik	diplomatic
misiya	mission
vakolatxonasi	office
farg‘ona	Fergana
shahriga	to city	city	#REF!
ko‘chirilgani	being
ma’lum	announced
bo‘ldi	was
xalqaro	international
moliya	finance
tashkilotlari	organizations
blits	blitz
muzokaralar	negotiations
o‘tkazdi	held
ijtimoiy	social
g‘oya	idea
yangilandi	was
harakat	action
dasturi	program
Davlat	State
byudjeti	budget
muhokamada	under
avval	earlier
taqdim	qilingan
loyiha	project
ma’qullandi	was
kredit	credit
grant	grant
bitimlari	agreements
rasmiylashtirildi	were
davlat	State
rahbarlari	leaders
birgalikda	jointly
bayonot	statement
qabul	qildi
harbiy	military
sanoat	industry
kompleksi	complex
rivojlanmoqda	is
donor	donor
mablag‘lari	funds
yanada	further
keng	wide
ko‘lamda	scale
jalb	attracted
etilmoqda	are
xalq	people
manfaatlari	interests
birinchi	first
o‘ringa	priority
qo‘yildi	were
turizm	tourism
sektori	sector
rekord	record
darajada	level
o‘sish	growth
ko‘rsatdi	showed
uchinchi	third
chorak	quarter
natijalari	results
xalqaro	international
ekspertlar	experts
tomonidan	by
olqishlandi	were
